# Supplementary material for: Cortical folding alterations in fetuses with isolated non-severe ventriculomegaly
Source: PubMed Central journal article supplement — Neuroimage Clin. 2018 Jan 28;18:103–14. doi: 10.1016/j.nicl.2018.01.006 (PMC5790022; doi:10.1016/j.nicl.2018.01.006), 2018-01-28
Supplement: mmc1.pdf [file mmc1.pdf]

# Cortical folding alterations in fetuses with isolated non-severe ventriculomegaly (Supplementary Material)

Oualid M. Benkarim<sup>a</sup>, Nadine Hahner<sup>b,c</sup>, Gemma Piella<sup>a</sup>, Eduard Gratacos<sup>b,c</sup>, Miguel Angel González Ballester<sup>a,d</sup>,  
Elisenda Eixarch<sup>b,c</sup>, Gerard Sanroma<sup>a</sup>

<sup>a</sup>DTIC, Universitat Pompeu Fabra, Barcelona, Spain

<sup>b</sup>Fetal i+D Fetal Medicine Research Center, BCNatal - Barcelona Center for Maternal-Fetal and Neonatal Medicine (Hospital Clínic and Hospital Sant Joan de Deu), Institut Clínic de Ginecologia, Obstetricia i Neonatologia, IDIBAPS, Universitat de Barcelona, Barcelona, Spain

<sup>c</sup>Centre for Biomedical Research on Rare Diseases (CIBER-ER), Barcelona, Spain

<sup>d</sup>ICREA, Barcelona, Spain

---

In support of cortical parcellation obtained using the neonatal atlas provided by (Makropoulos et al., 2014), we further include Figures 1- 48, displaying cortical surface parcellations of all subjects used in the study. Left and right hemispheres are shown for each subject in lateral, medial and ventral view.

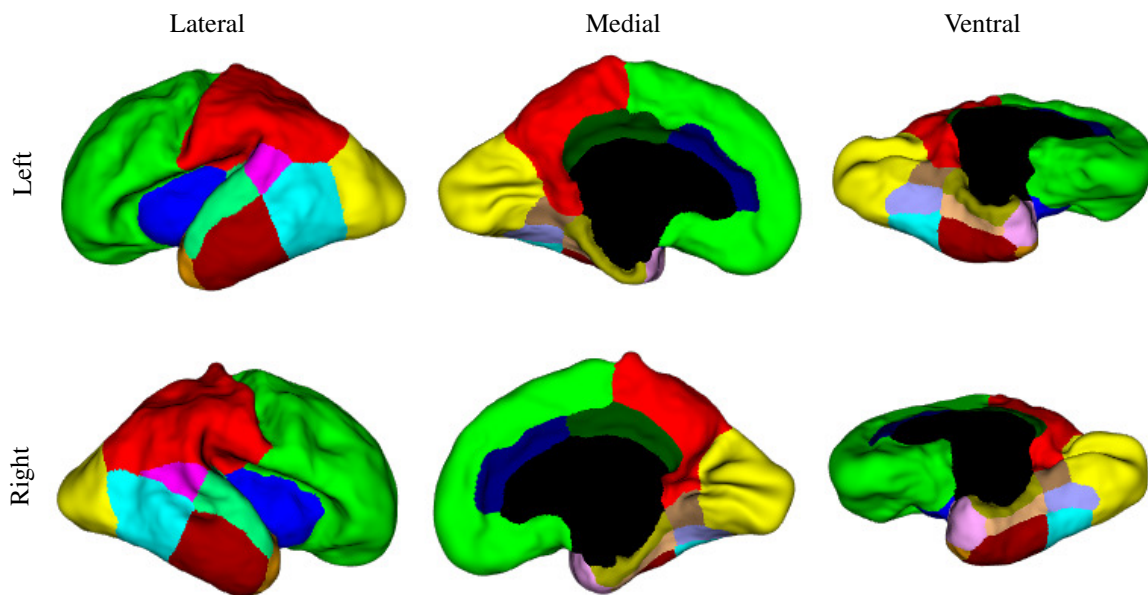

Figure 1: Cortical surface parcellation for a 28.0 GW fetus with left INSVM.

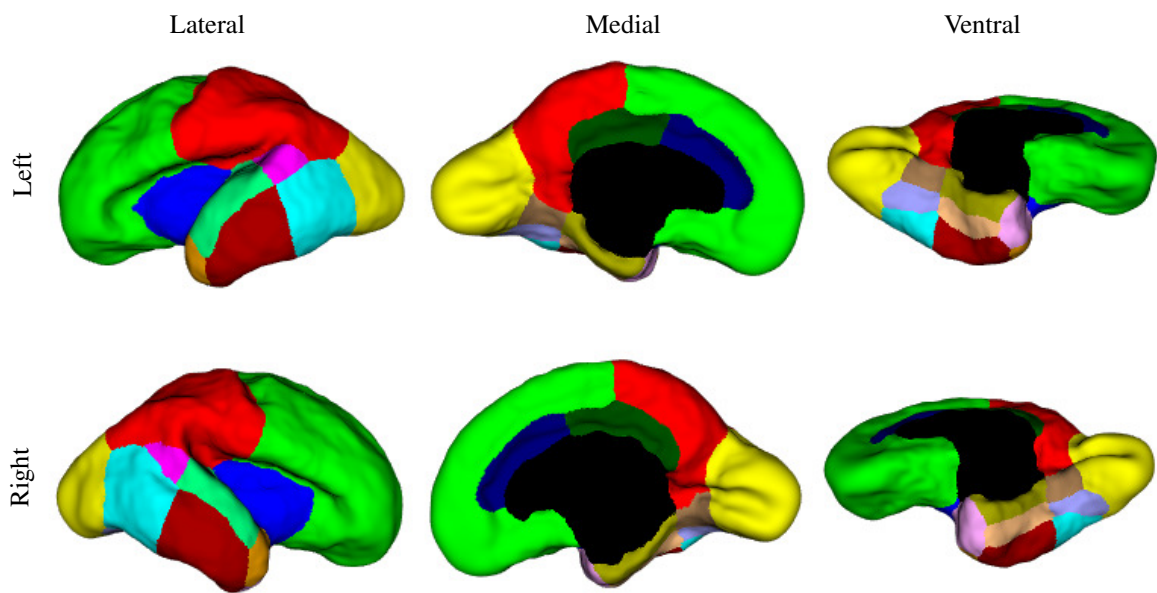

Figure 2: Cortical surface parcellation for a 26.3 GW fetus with left INSVM.

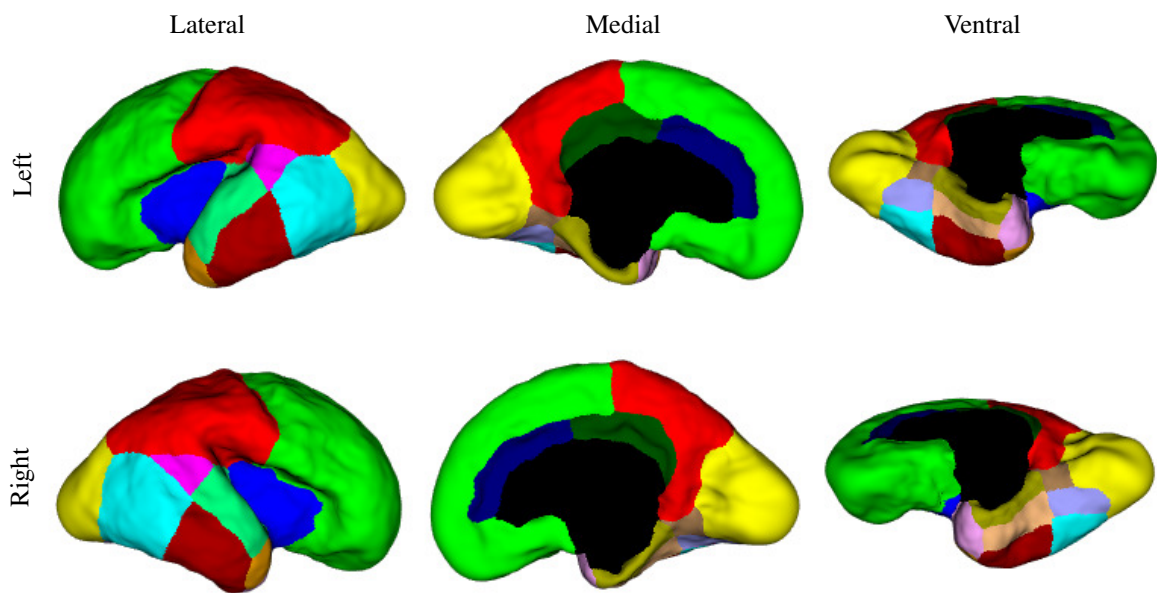

Figure 3: Cortical surface parcellation for a 26.9 GW fetus with bilateral INSVM.

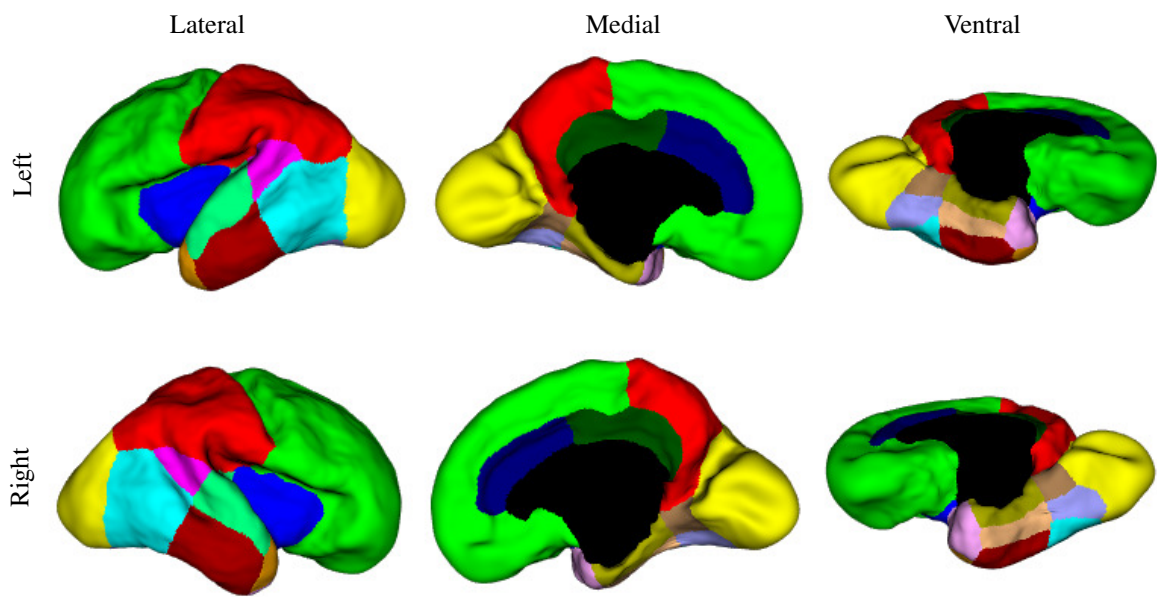

Figure 4: Cortical surface parcellation for a 28.6 GW healthy fetus.

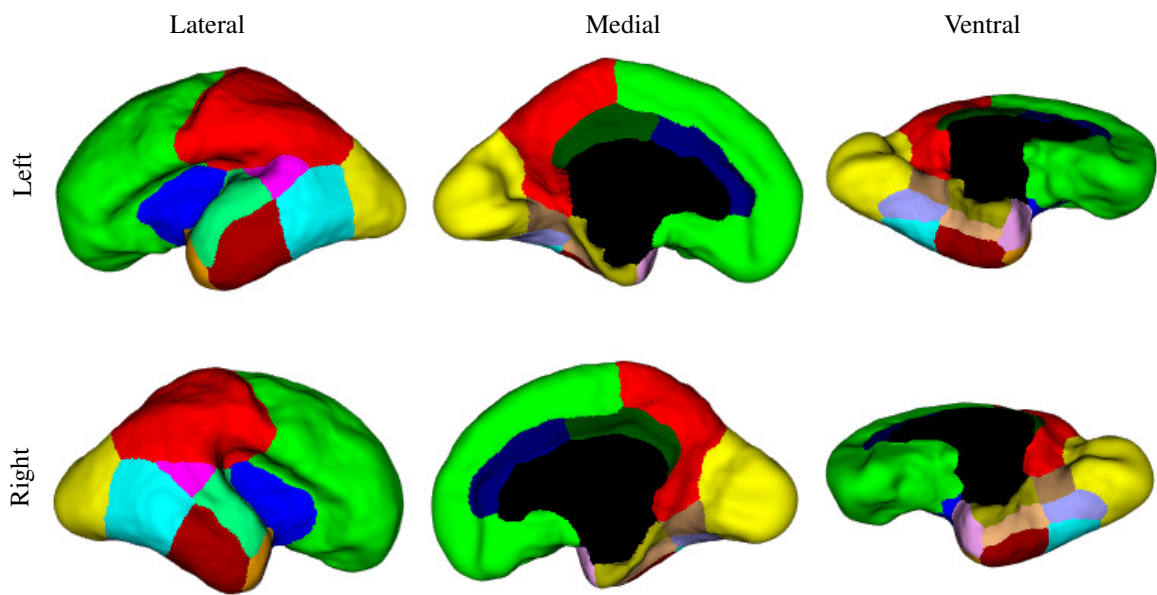

Figure 5: Cortical surface parcellation for a 26.6 GW fetus with right INSVM.

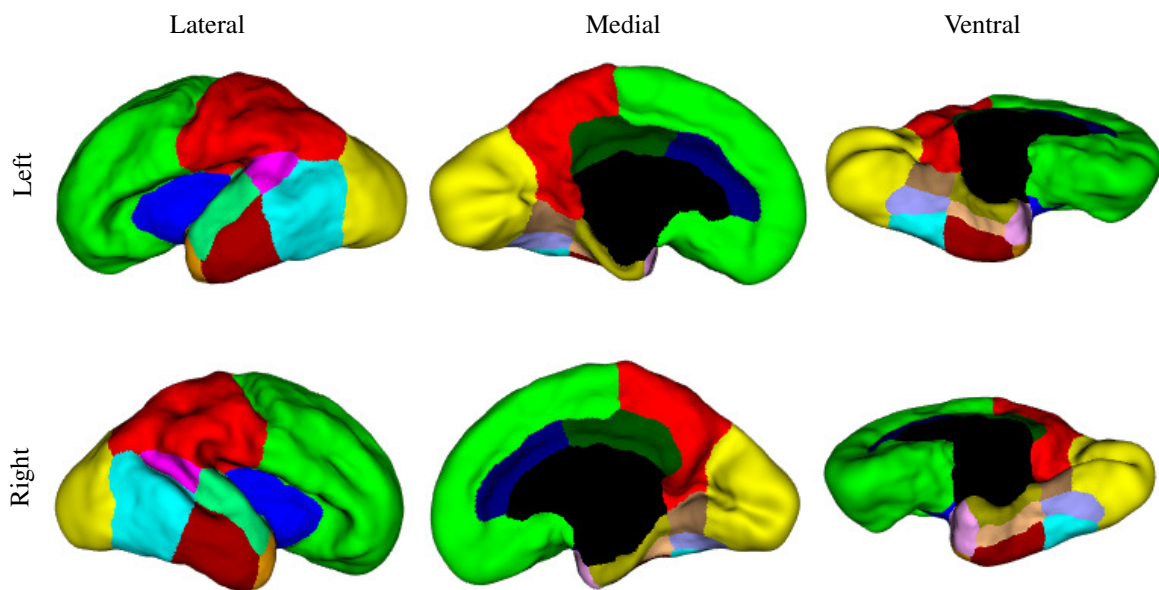

Figure 6: Cortical surface parcellation for a 28.0 GW fetus with left INSVM.

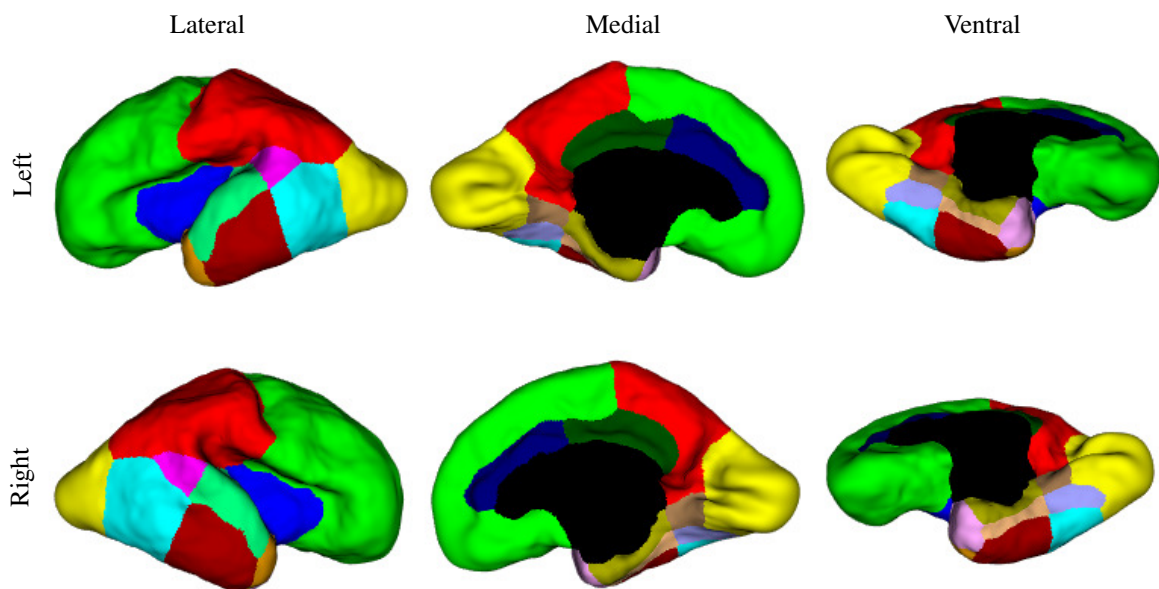

Figure 7: Cortical surface parcellation for a 26.9 GW healthy fetus.



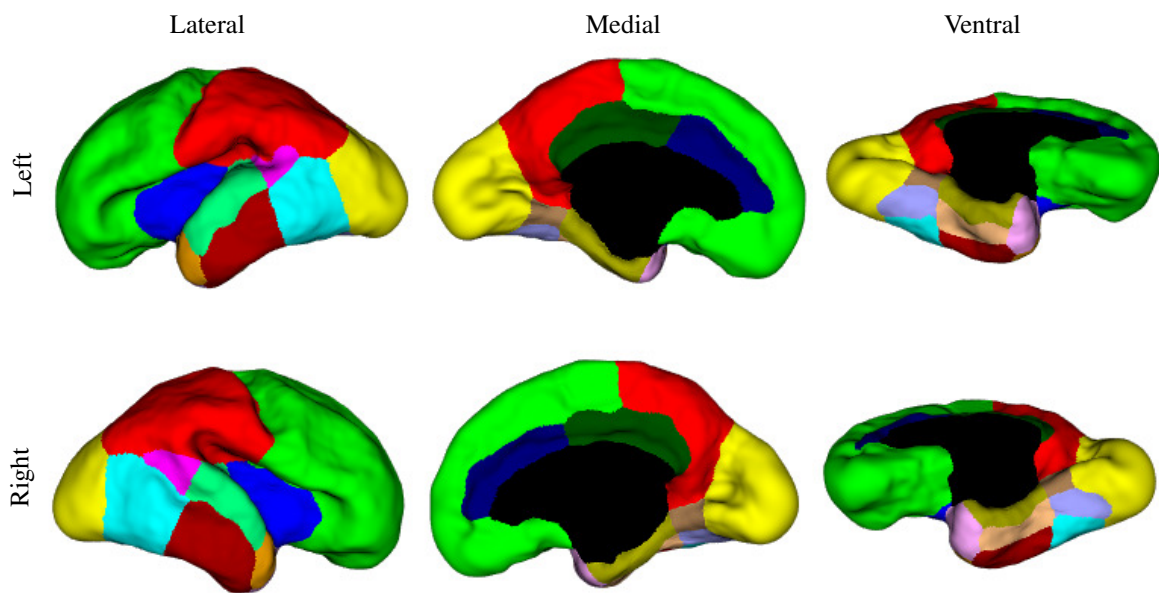

Figure 8: Cortical surface parcellation for a 26.7 GW healthy fetus.

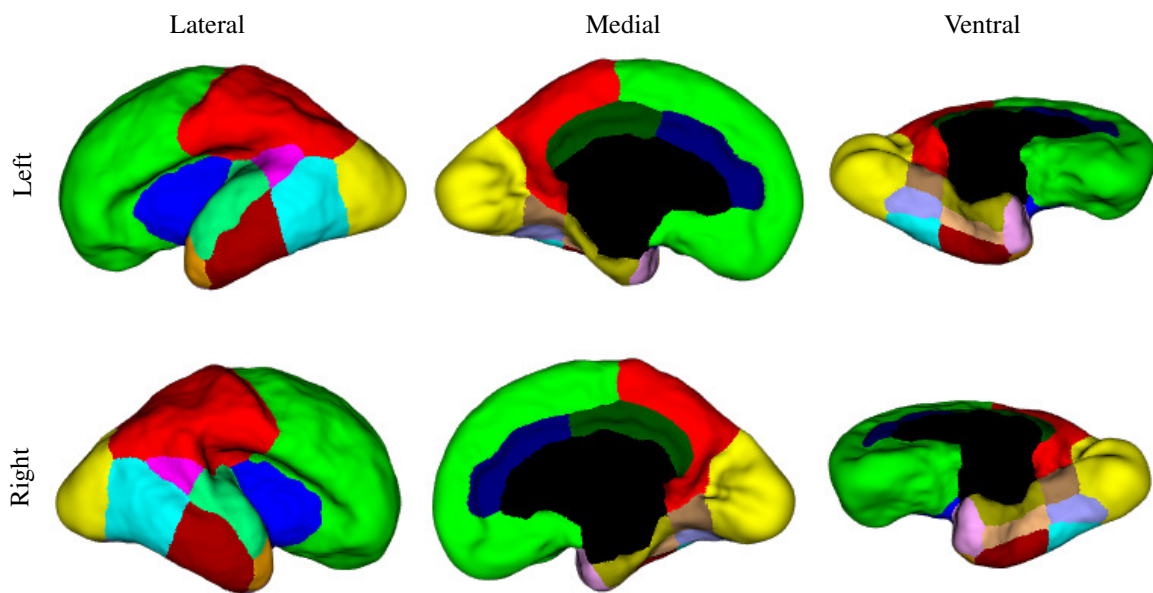

Figure 9: Cortical surface parcellation for a 26.4 GW healthy fetus.

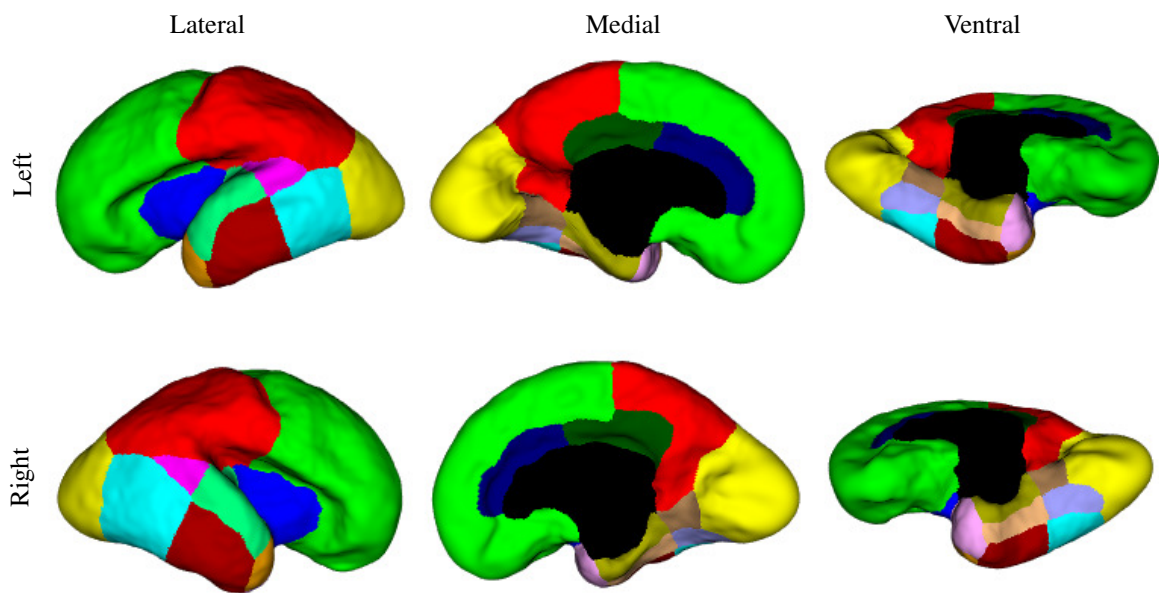

Figure 10: Cortical surface parcellation for a 26.4 GW fetus with right INSVM.

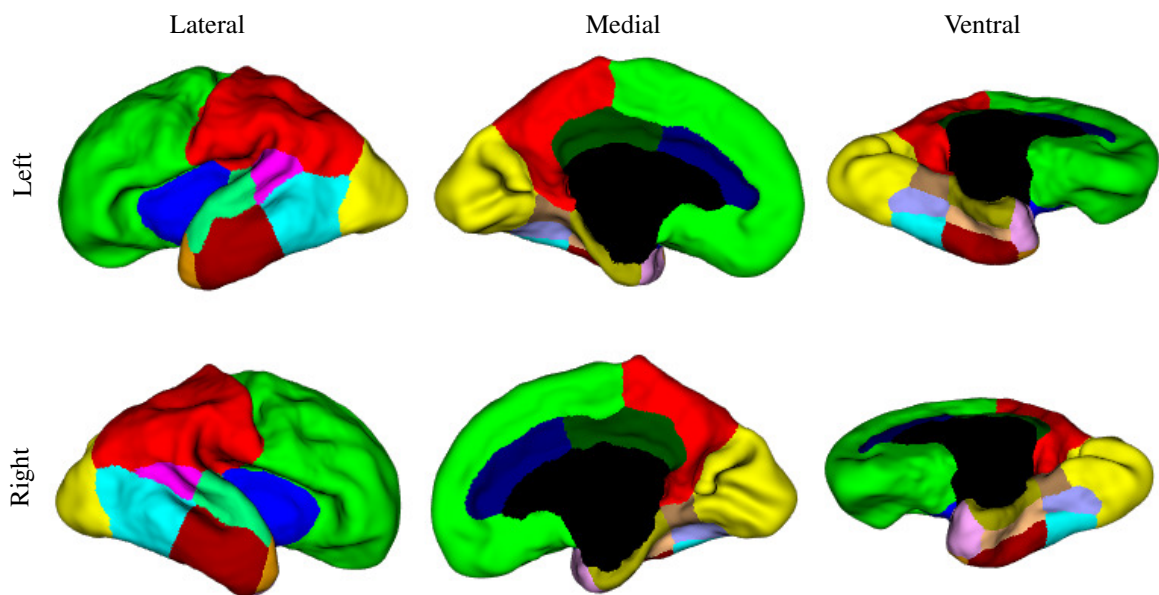

Figure 11: Cortical surface parcellation for a 27.3 GW healthy fetus.

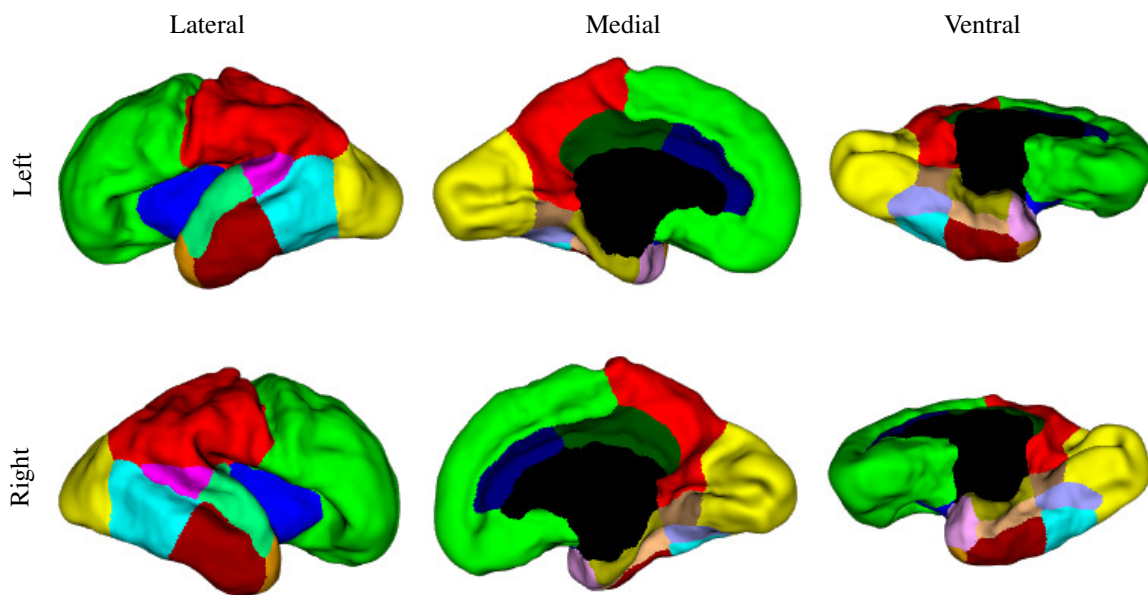

Figure 12: Cortical surface parcellation for a 28.7 GW healthy fetus.

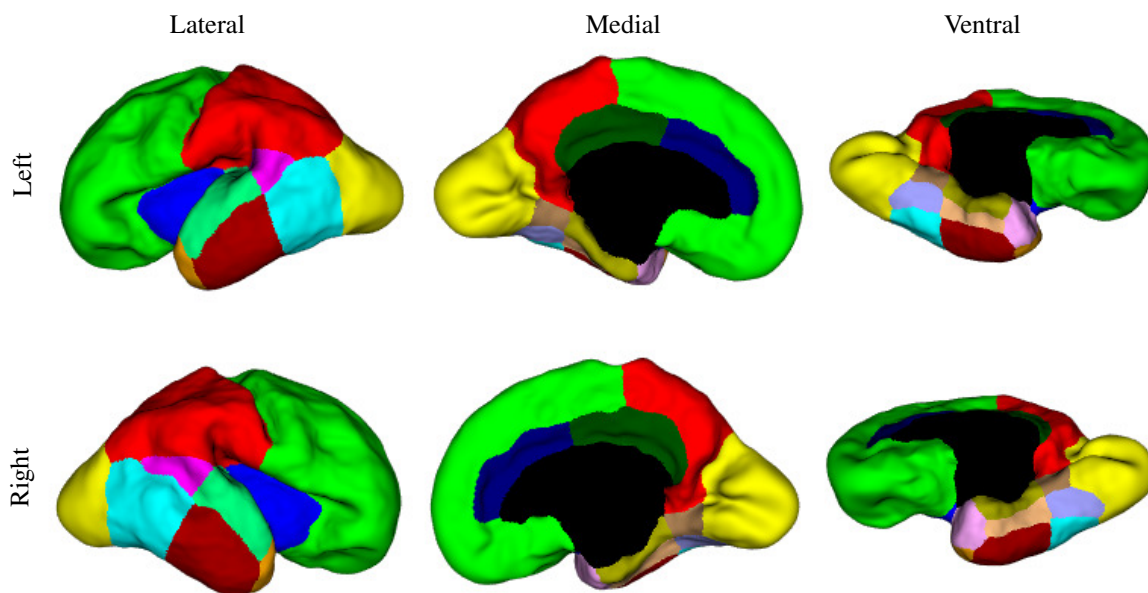

Figure 13: Cortical surface parcellation for a 28.3 GW healthy fetus.

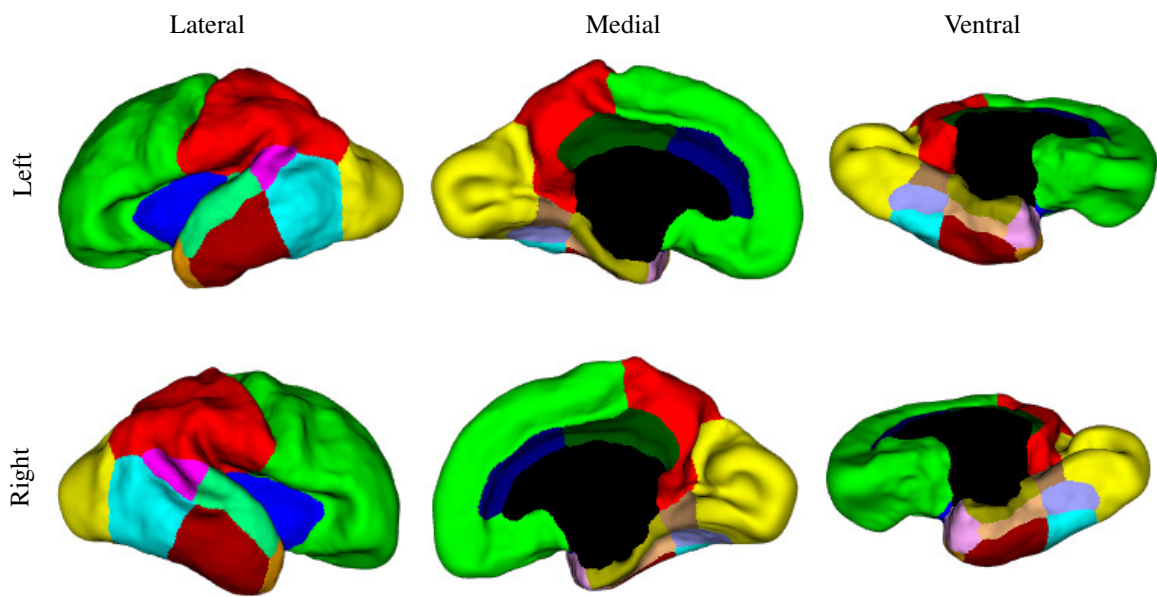

Figure 14: Cortical surface parcellation for a 28.7 GW healthy fetus.

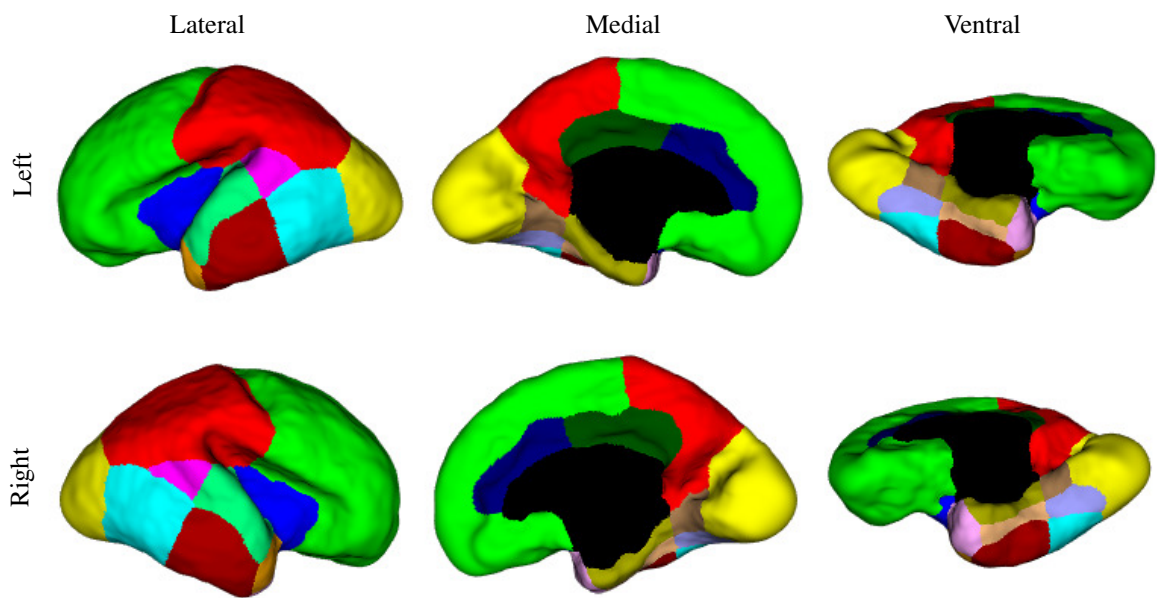

Figure 15: Cortical surface parcellation for a 26.3 GW healthy fetus.



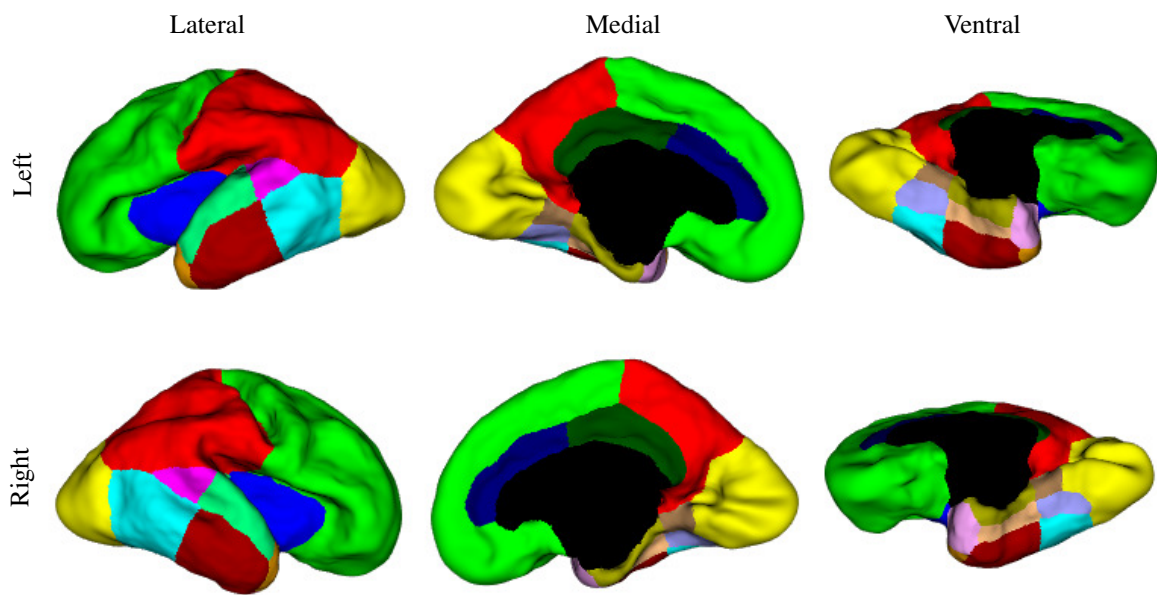

Figure 16: Cortical surface parcellation for a 28.3 GW healthy fetus.

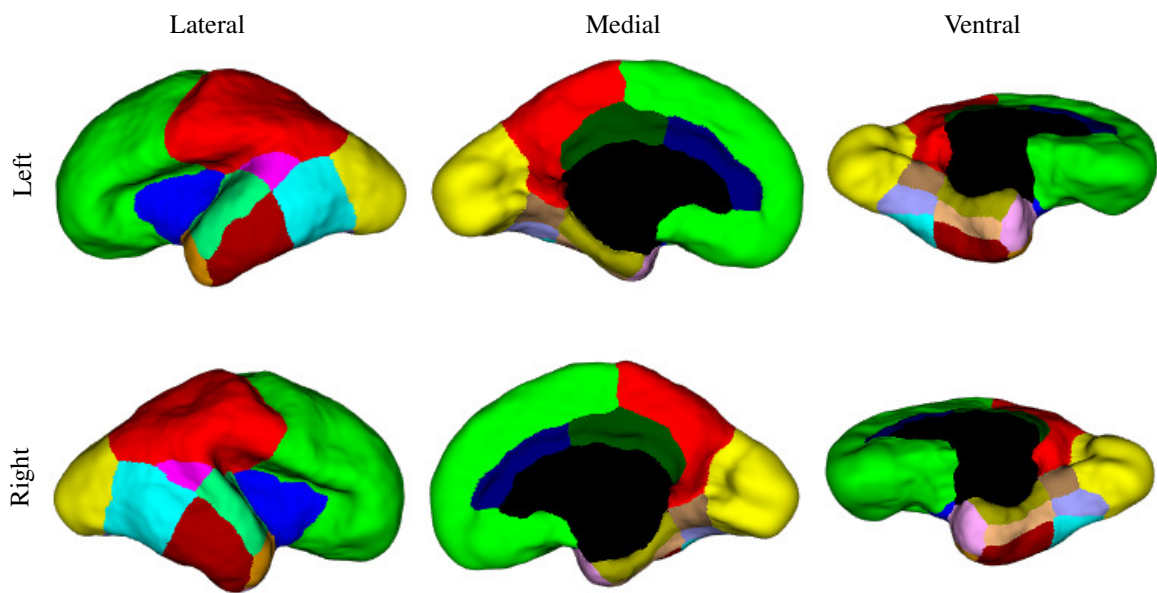

Figure 17: Cortical surface parcellation for a 26.6 GW healthy fetus.

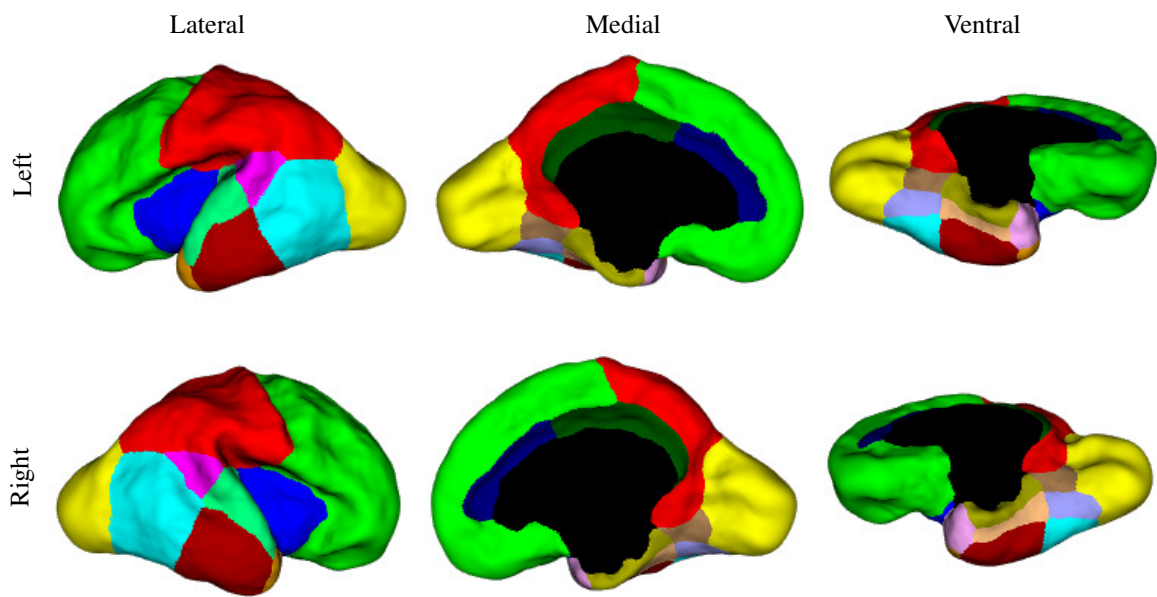

Figure 18: Cortical surface parcellation for a 27.3 GW fetus with bilateral INSVM.

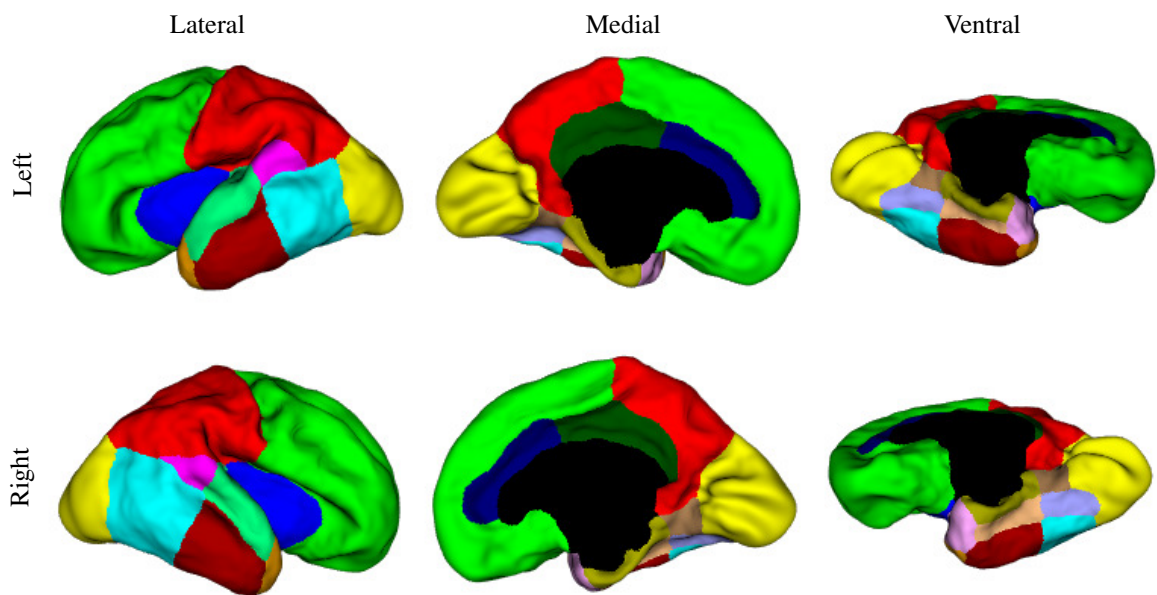

Figure 19: Cortical surface parcellation for a 28.3 GW fetus with right INSVM.

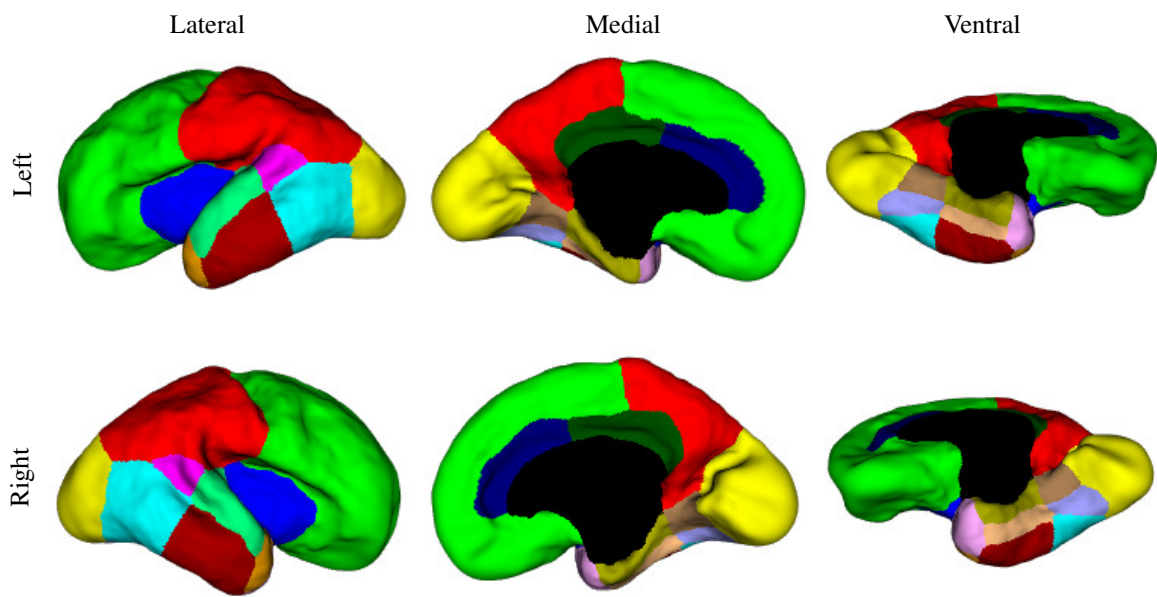

Figure 20: Cortical surface parcellation for a 27.1 GW healthy fetus.

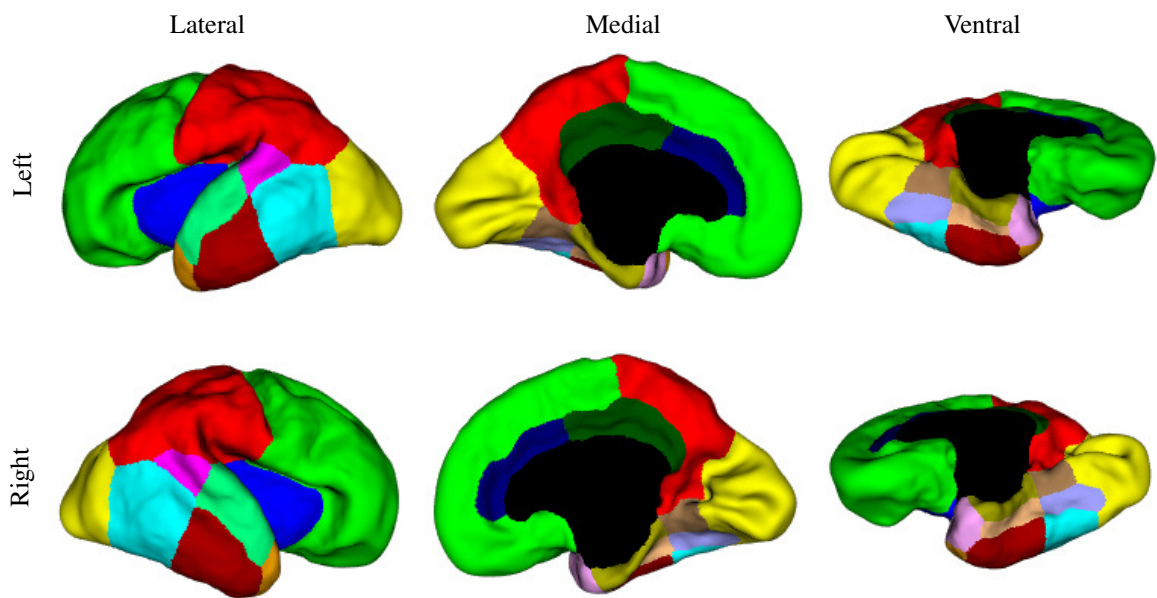

Figure 21: Cortical surface parcellation for a 28.6 GW fetus with left INSVM.

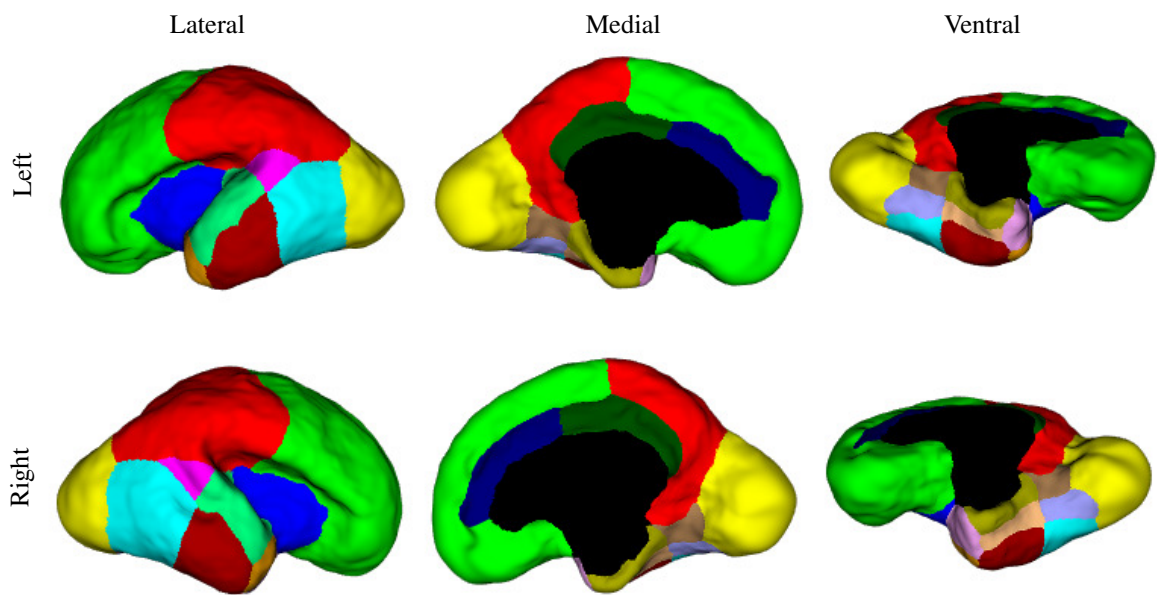

Figure 22: Cortical surface parcellation for a 26.1 GW fetus with bilateral INSVM.

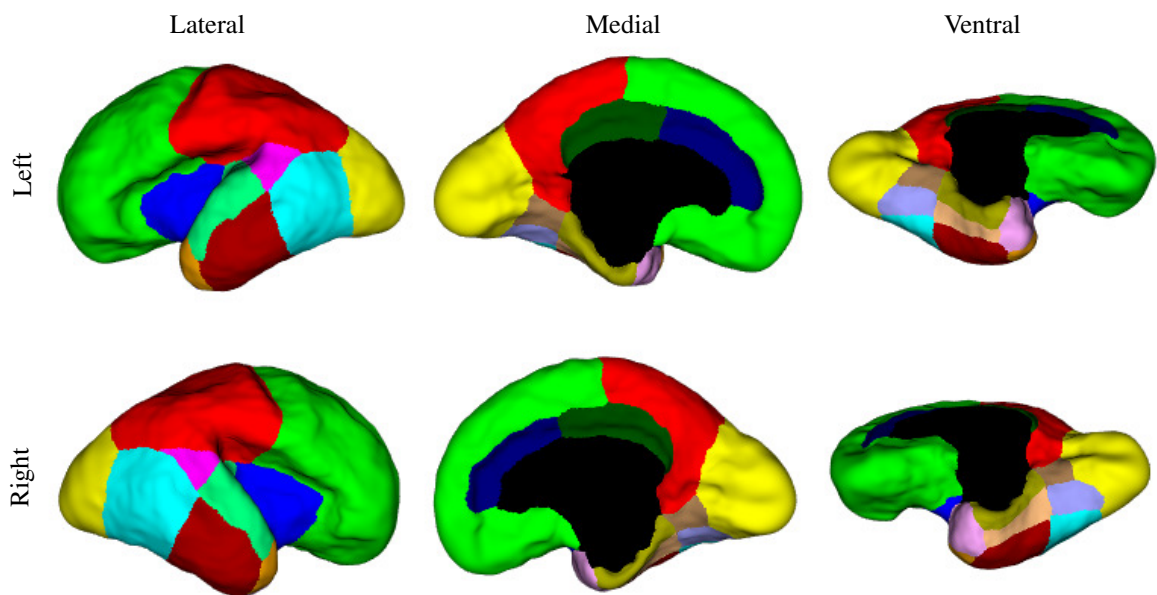

Figure 23: Cortical surface parcellation for a 26.4 GW fetus with right INSVM.



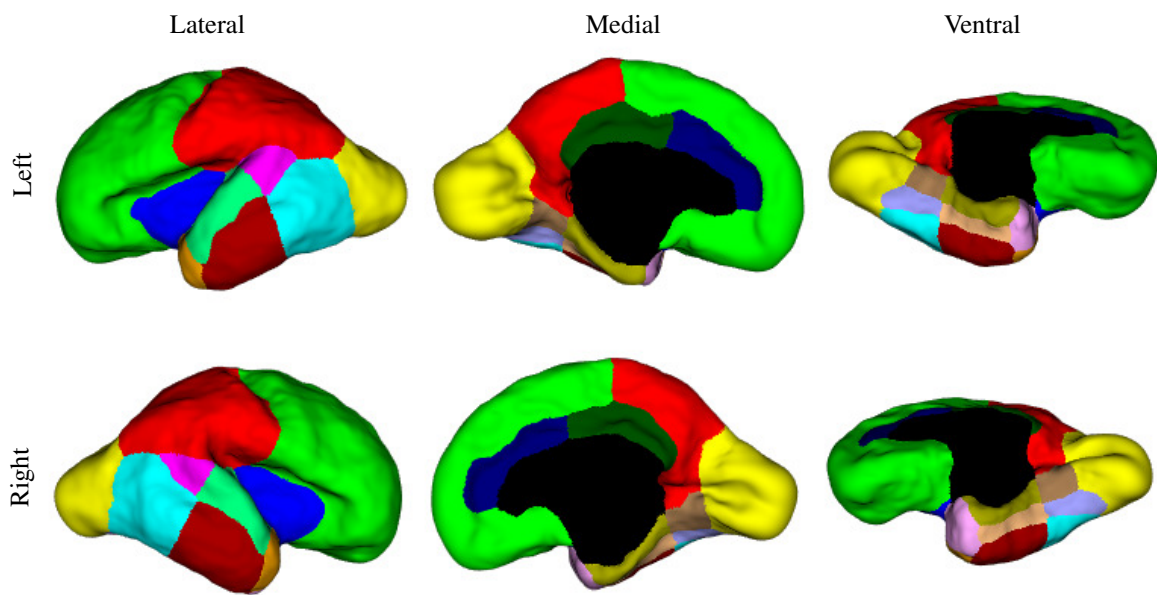

Figure 24: Cortical surface parcellation for a 26.6 GW healthy fetus.

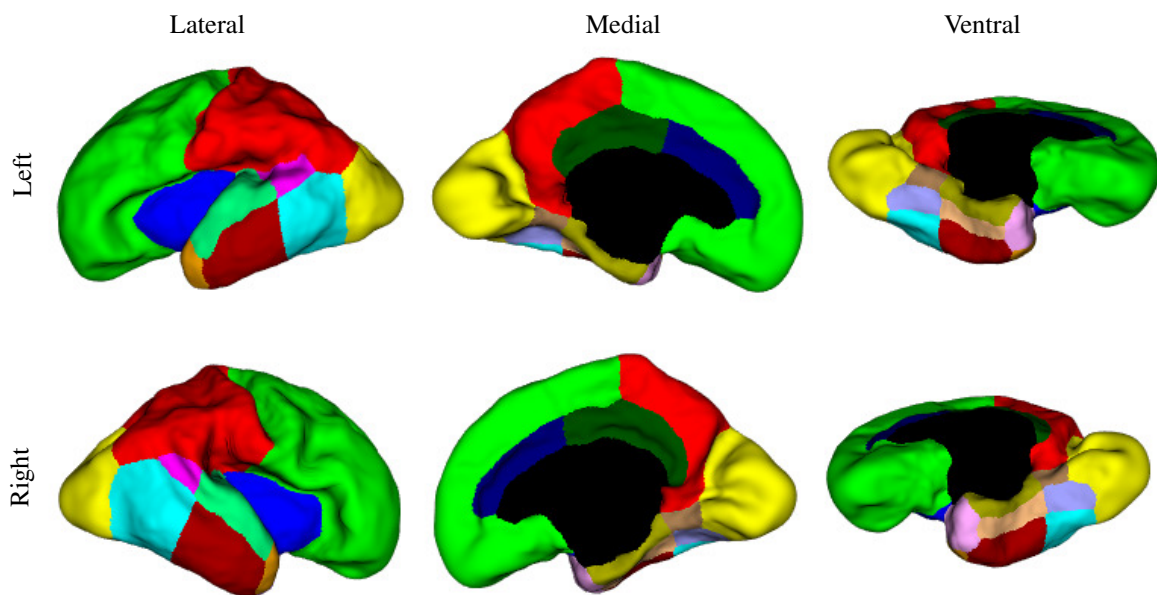

Figure 25: Cortical surface parcellation for a 28.4 GW healthy fetus.

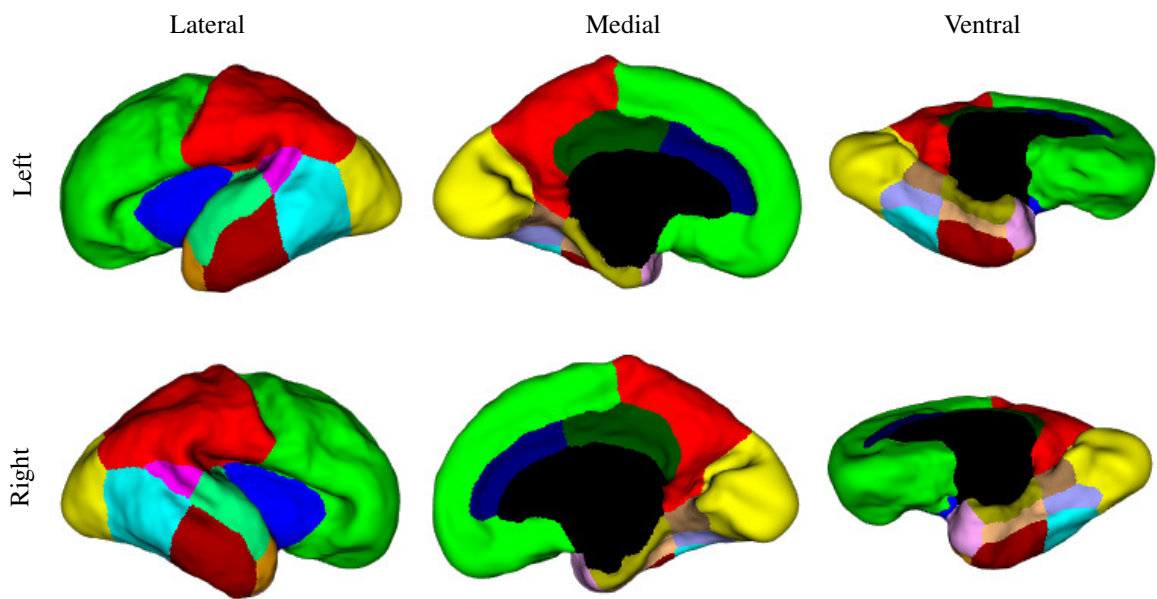

Figure 26: Cortical surface parcellation for a 27.9 GW healthy fetus.

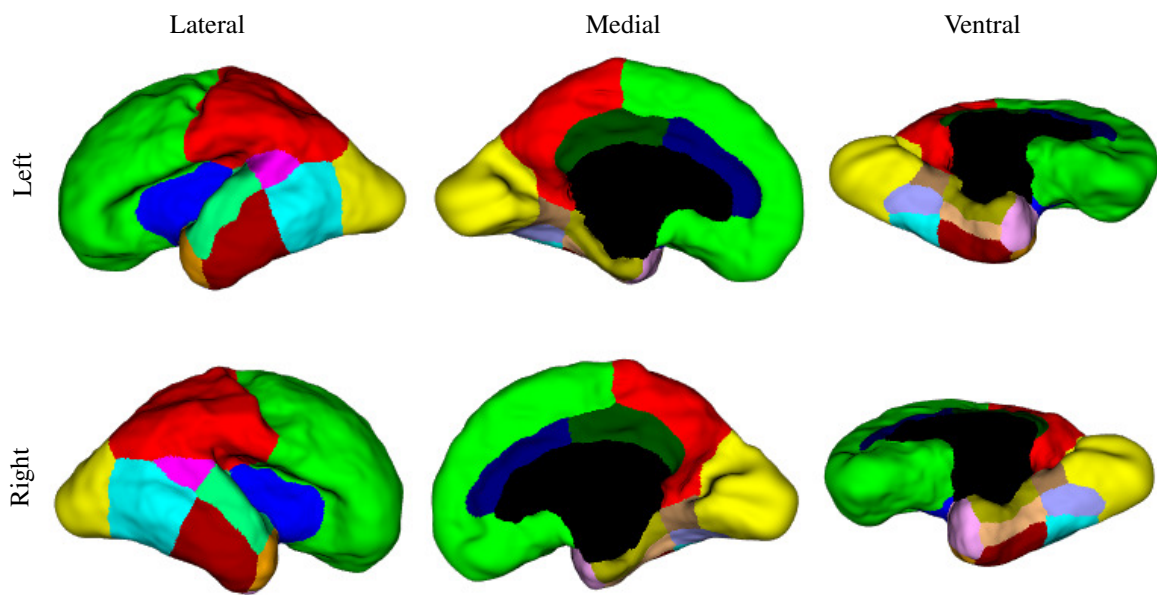

Figure 27: Cortical surface parcellation for a 26.9 GW healthy fetus.

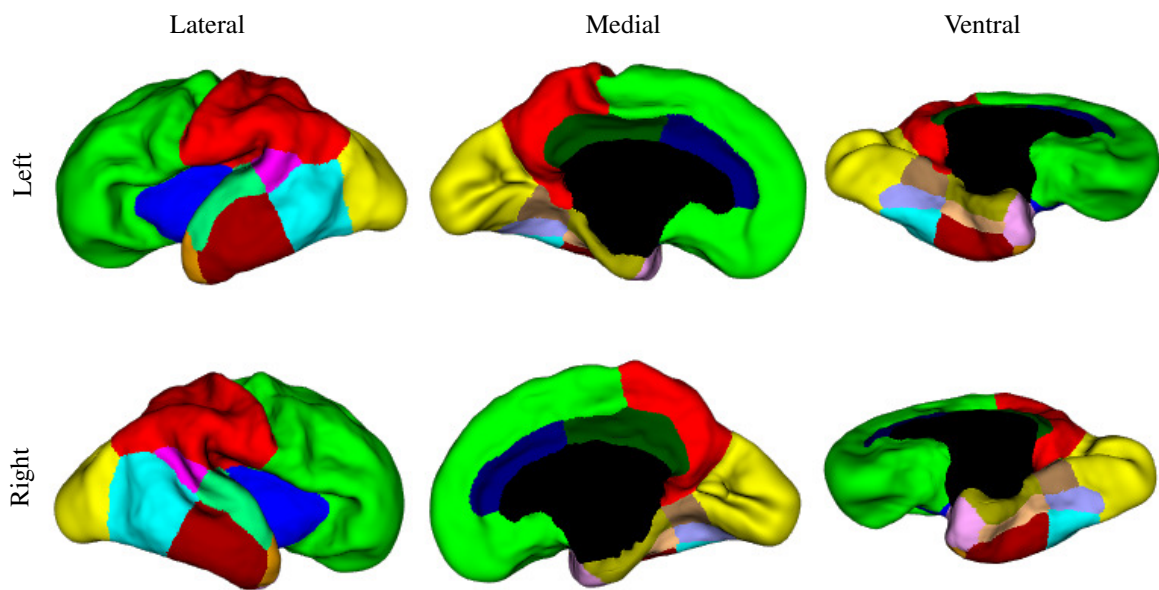

Figure 28: Cortical surface parcellation for a 28.7 GW healthy fetus.

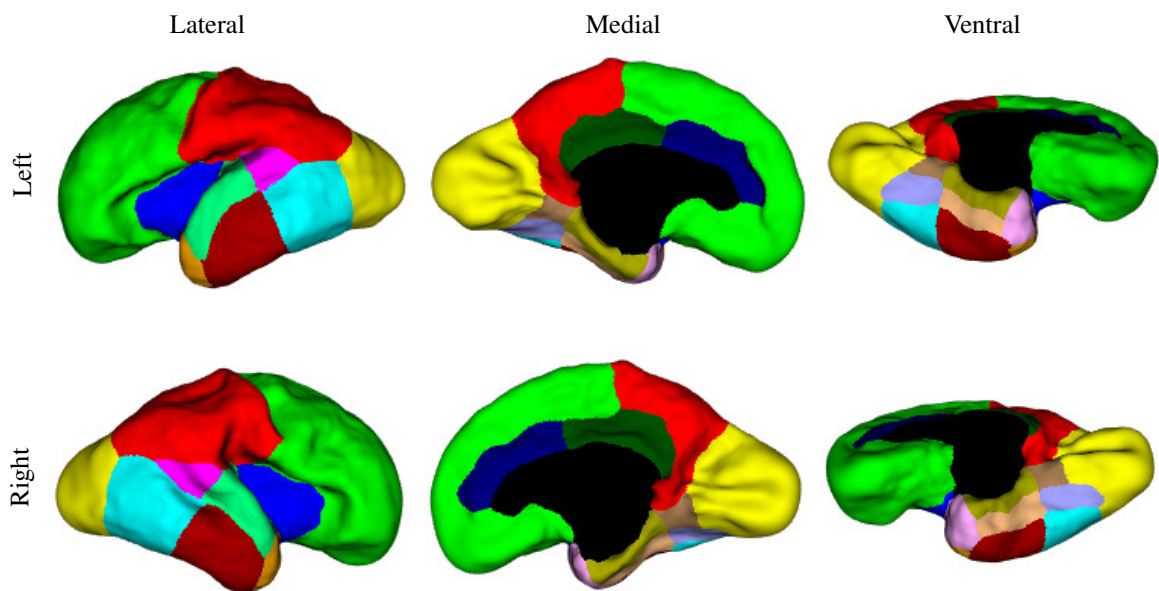

Figure 29: Cortical surface parcellation for a 27.4 GW fetus with right INSVM.

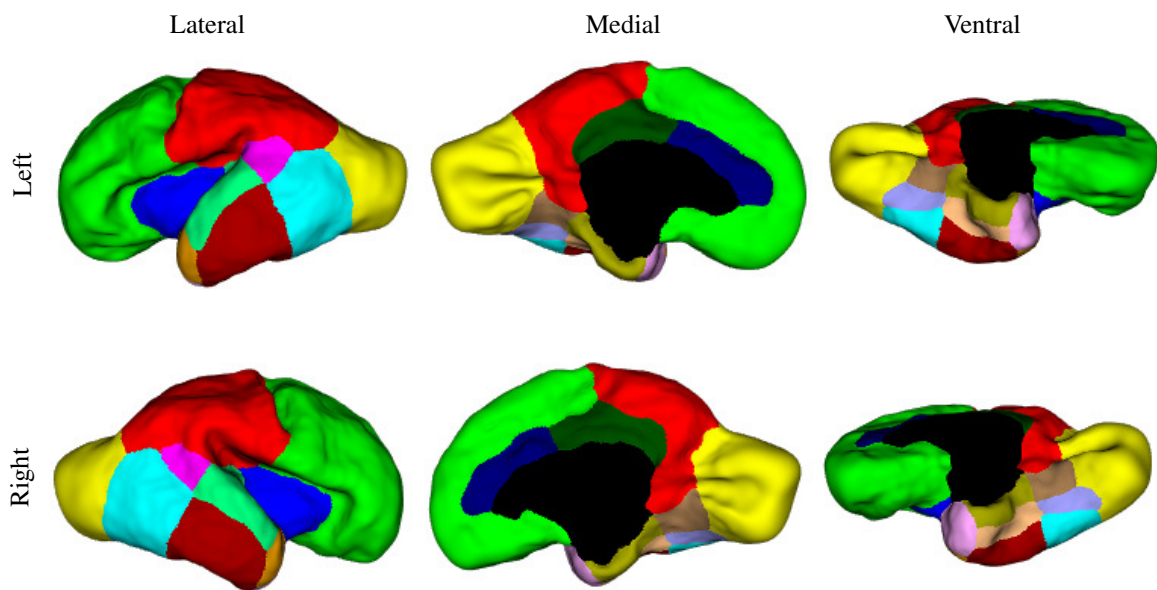

Figure 30: Cortical surface parcellation for a 28.4 GW fetus with bilateral INSVM.

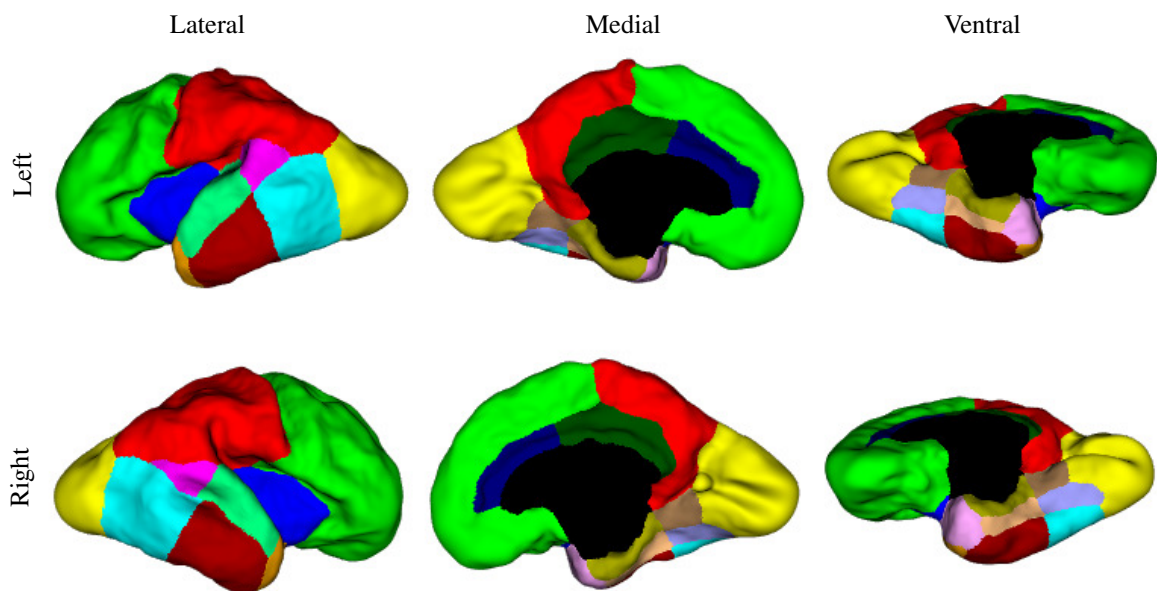

Figure 31: Cortical surface parcellation for a 28.0 GW fetus with left INSVM.



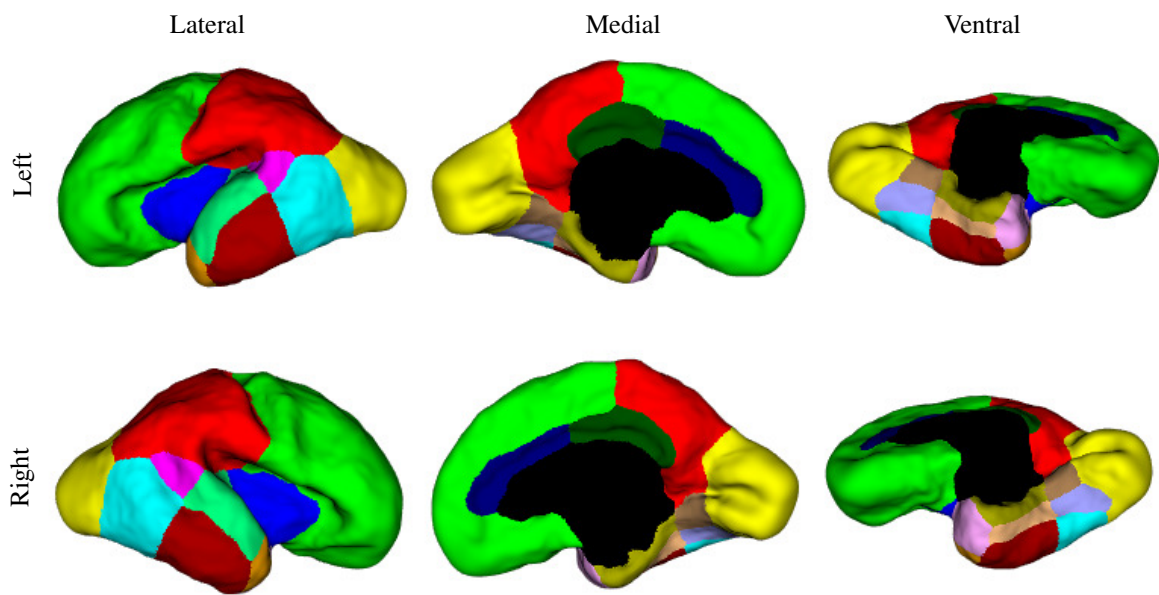

Figure 32: Cortical surface parcellation for a 27.0 GW healthy fetus.

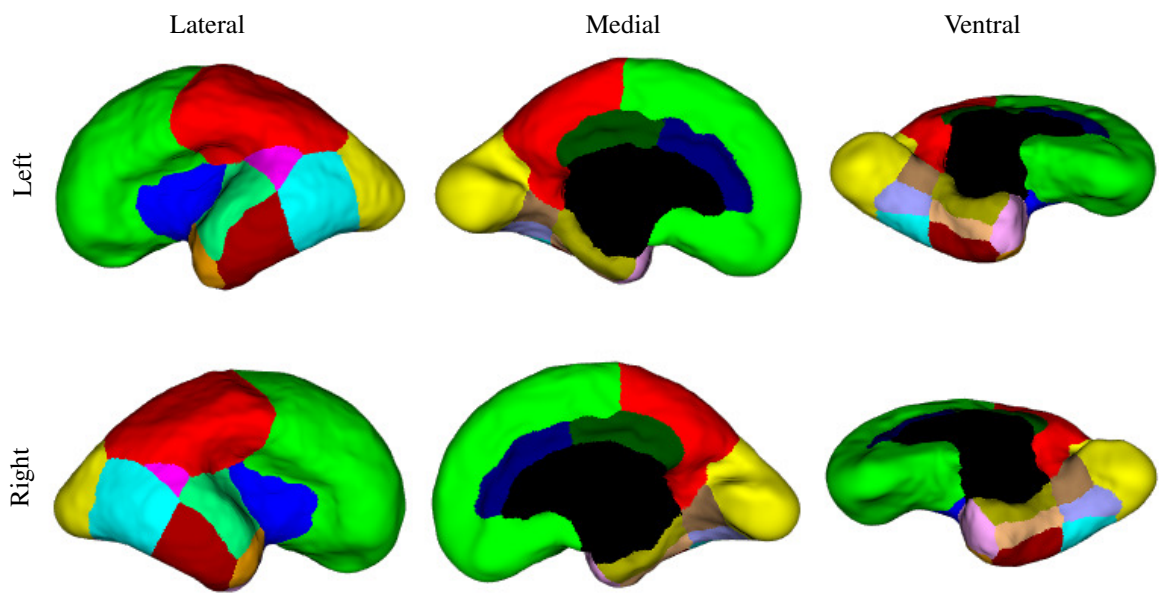

Figure 33: Cortical surface parcellation for a 26.3 GW healthy fetus.

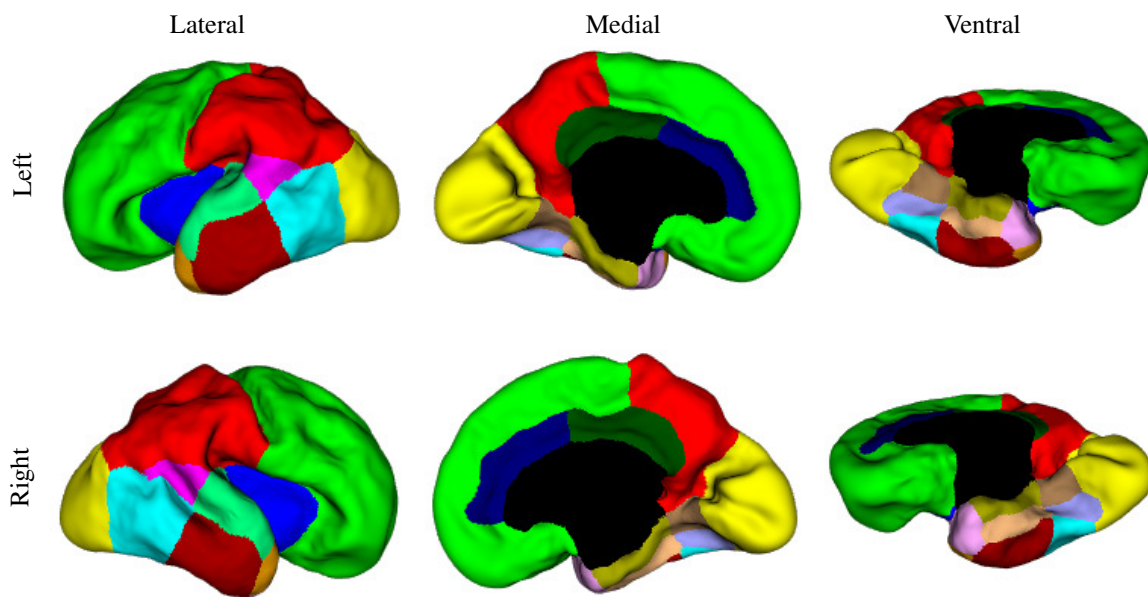

Figure 34: Cortical surface parcellation for a 28.6 GW healthy fetus.

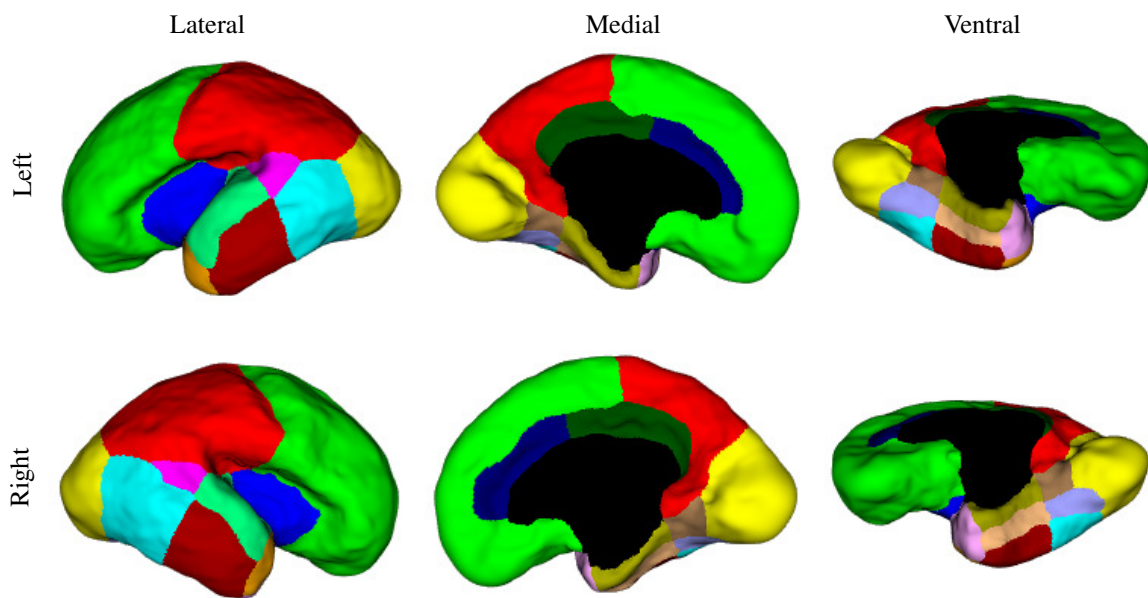

Figure 35: Cortical surface parcellation for a 26.0 GW fetus with right INSVM.

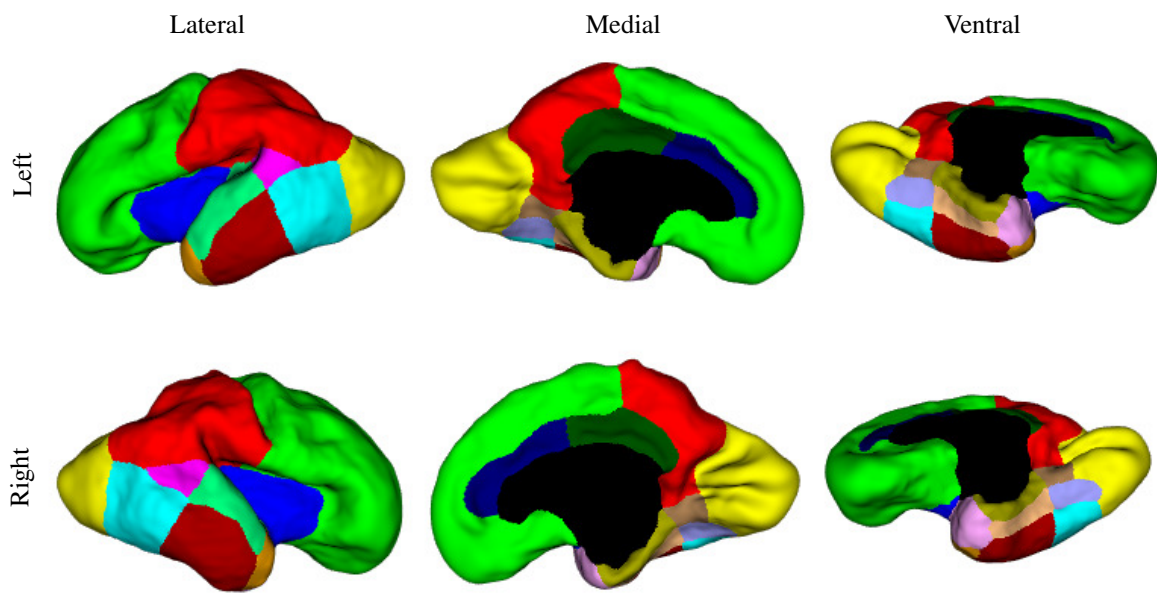

Figure 36: Cortical surface parcellation for a 28.0 GW fetus with left INSVM.

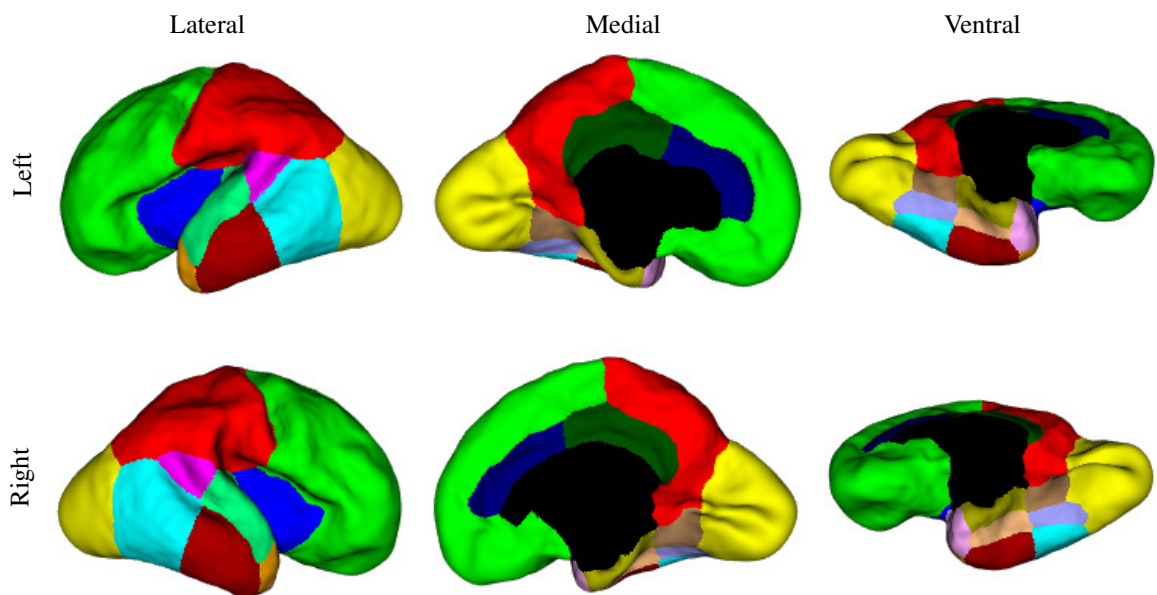

Figure 37: Cortical surface parcellation for a 27.6 GW fetus with bilateral INSVM.

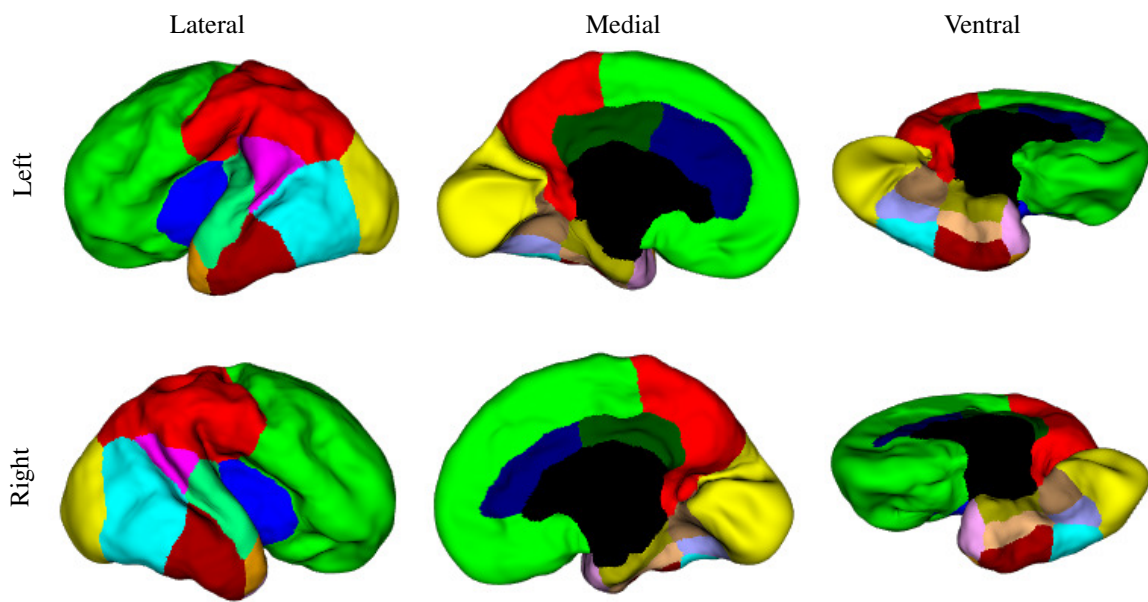

Figure 38: Cortical surface parcellation for a 28.4 GW fetus with left INSVM.

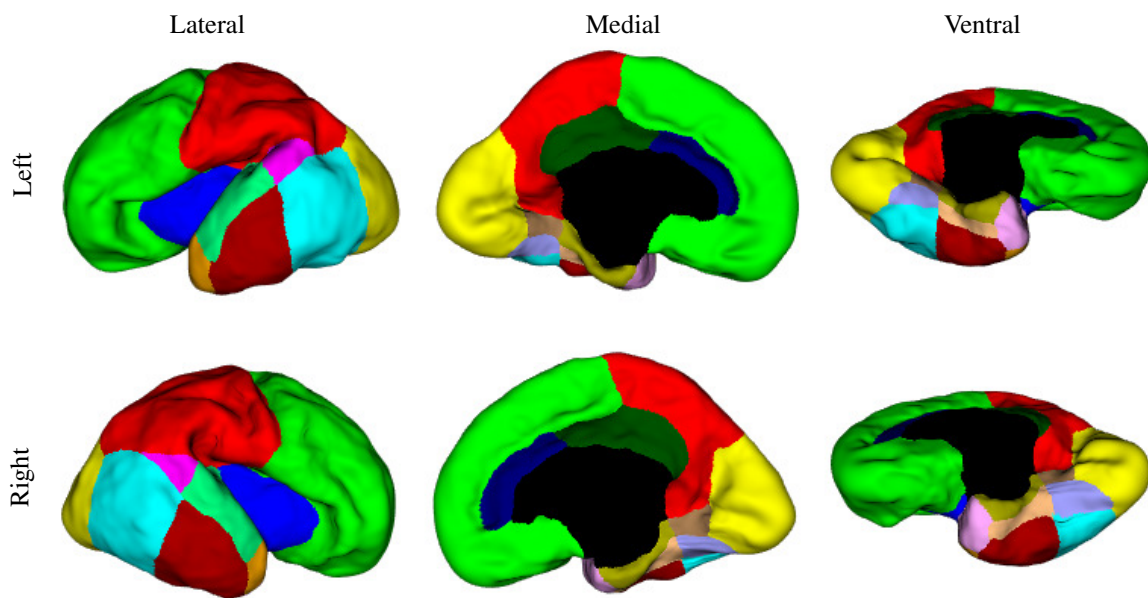

Figure 39: Cortical surface parcellation for a 28.1 GW fetus with right INSVM.



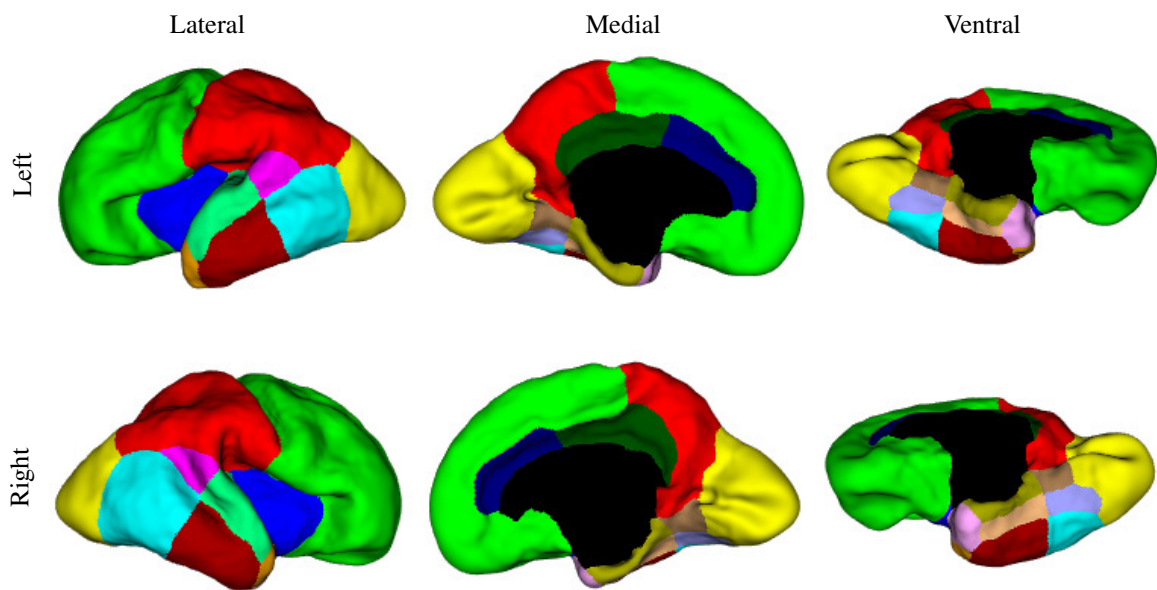

Figure 40: Cortical surface parcellation for a 28.6 GW fetus with right INSVM.

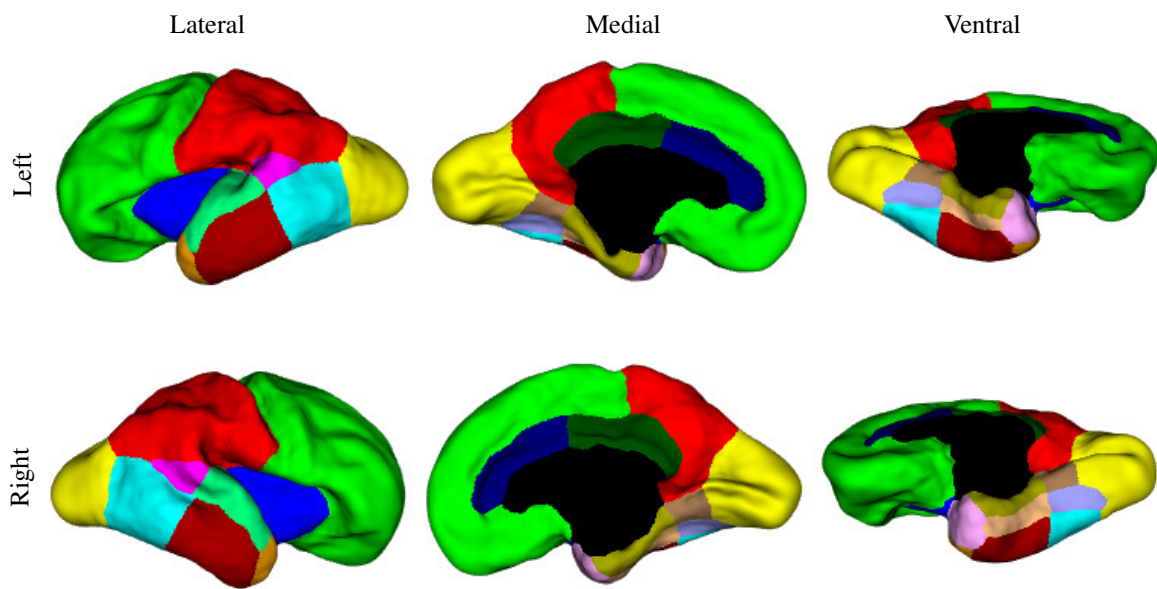

Figure 41: Cortical surface parcellation for a 28.0 GW healthy fetus.

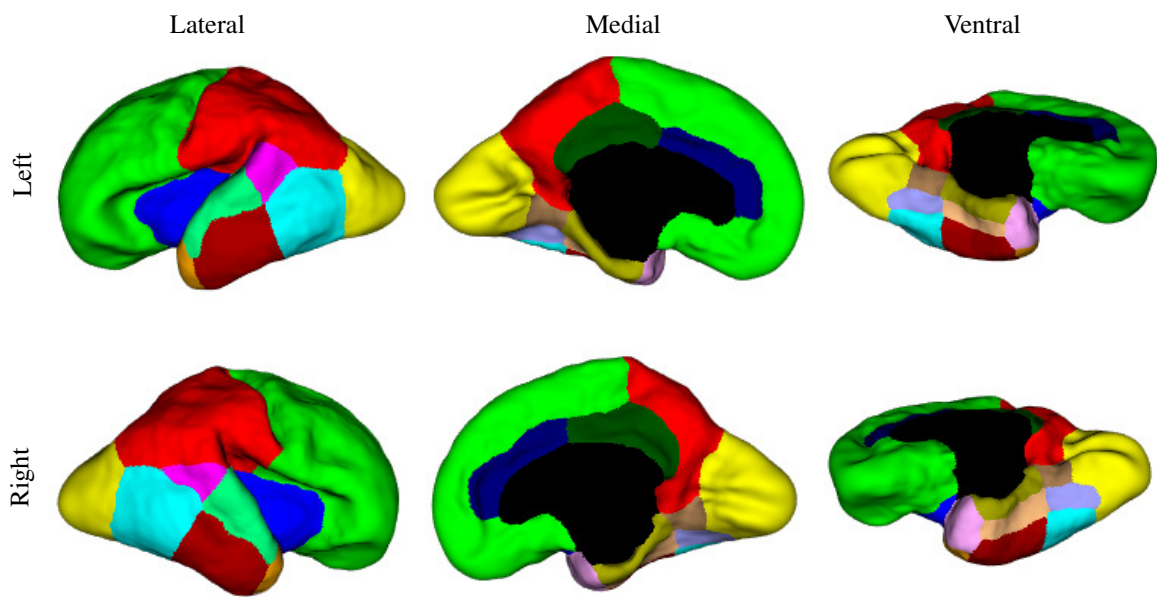

Figure 42: Cortical surface parcellation for a 28.0 GW fetus with right INSVM.

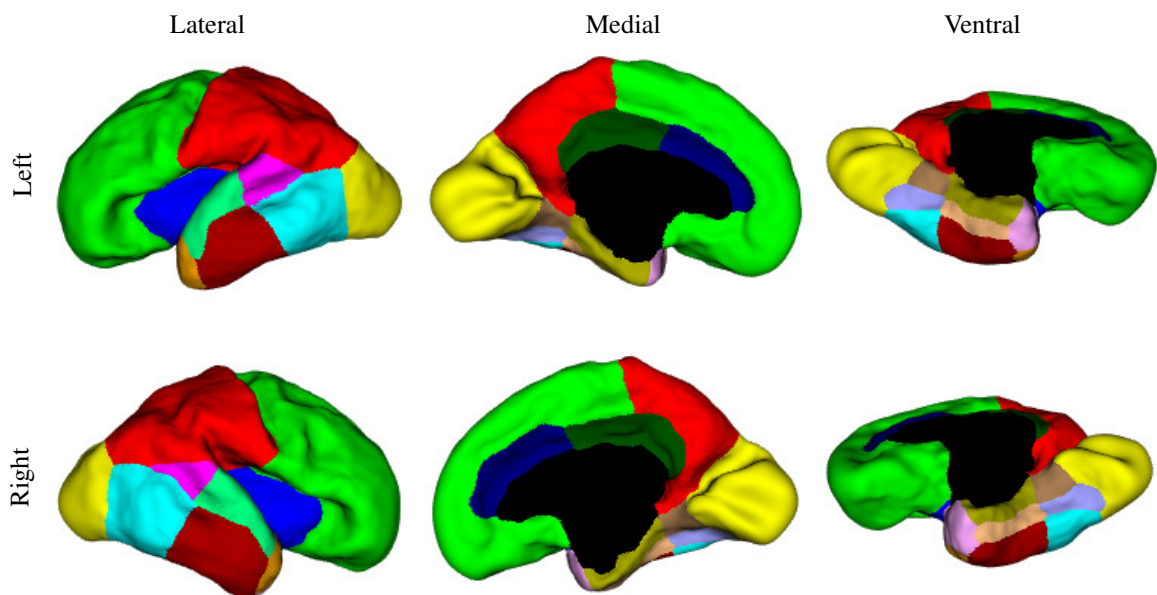

Figure 43: Cortical surface parcellation for a 28.1 GW healthy fetus.

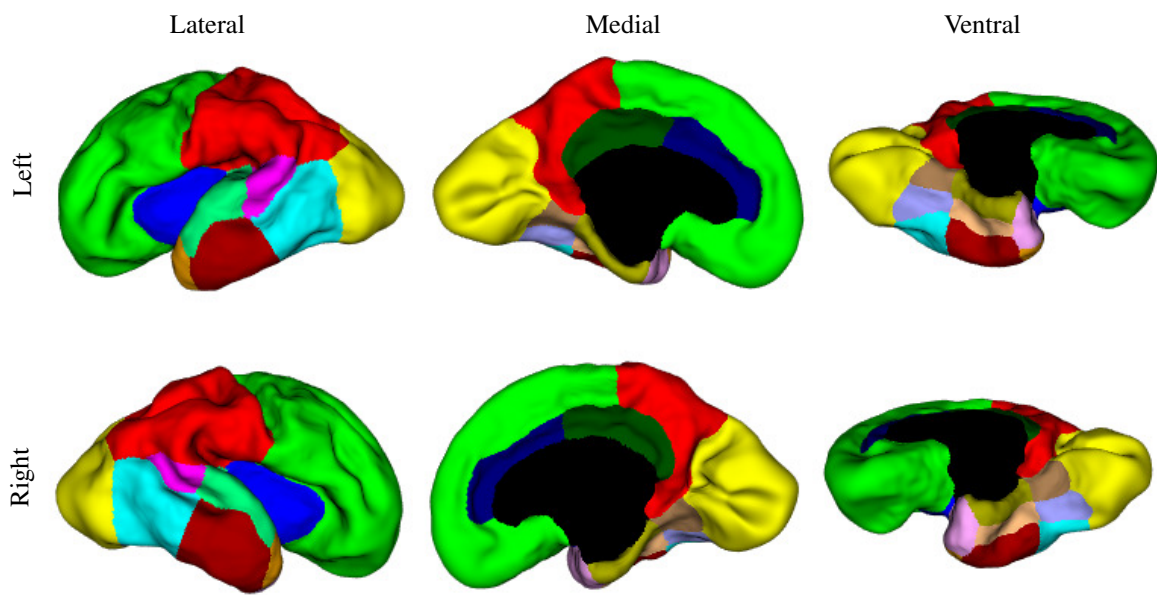

Figure 44: Cortical surface parcellation for a 28.9 GW healthy fetus.

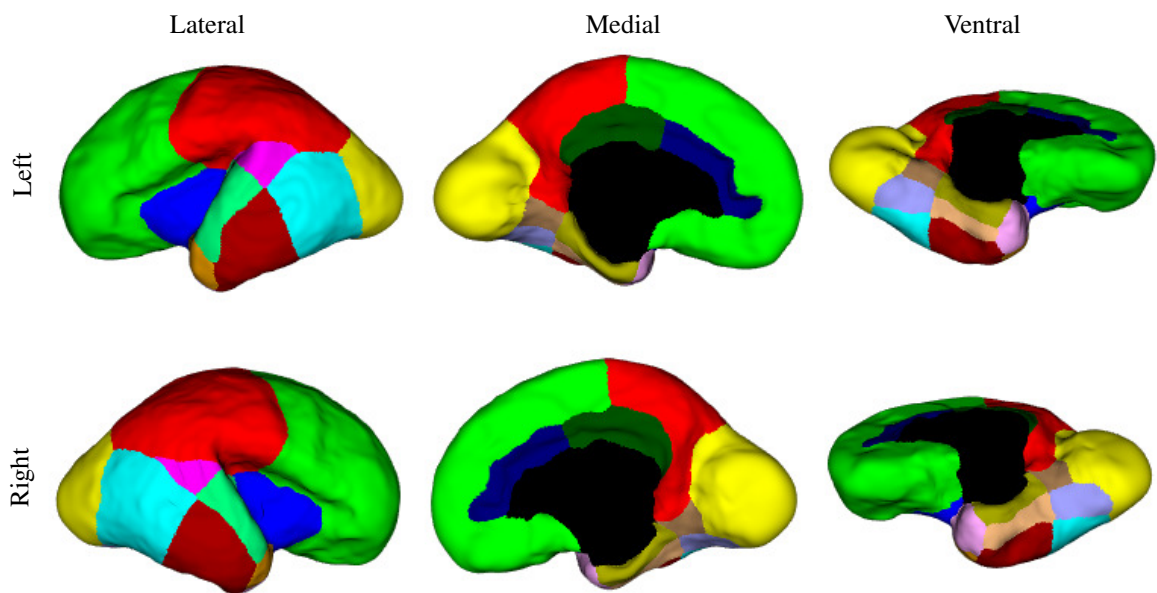

Figure 45: Cortical surface parcellation for a 26.1 GW fetus with right INSVM.

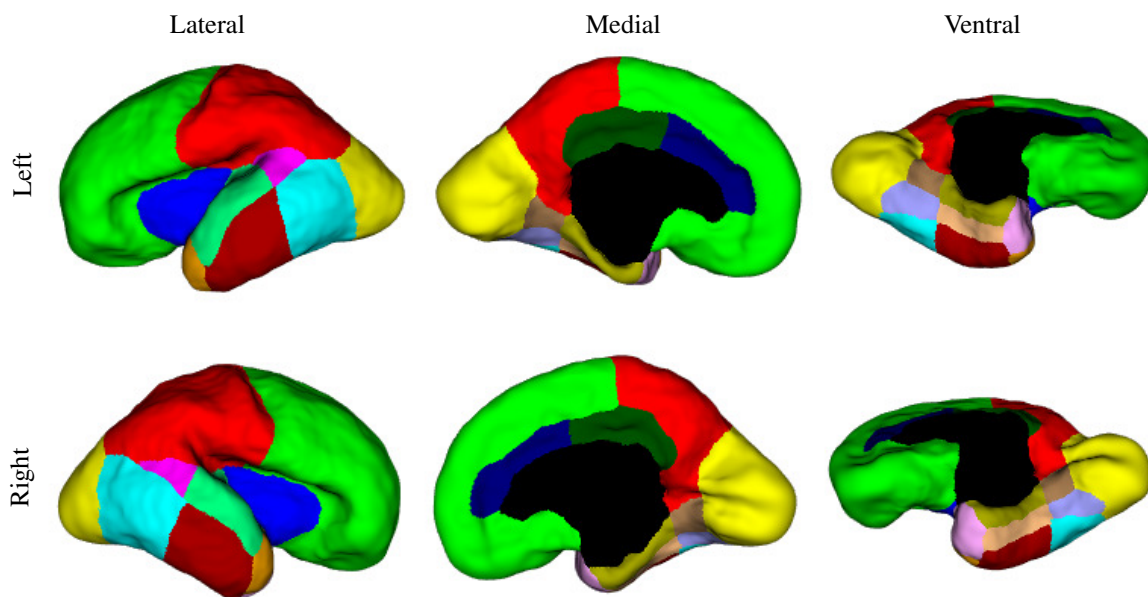

Figure 46: Cortical surface parcellation for a 27.0 GW healthy fetus.

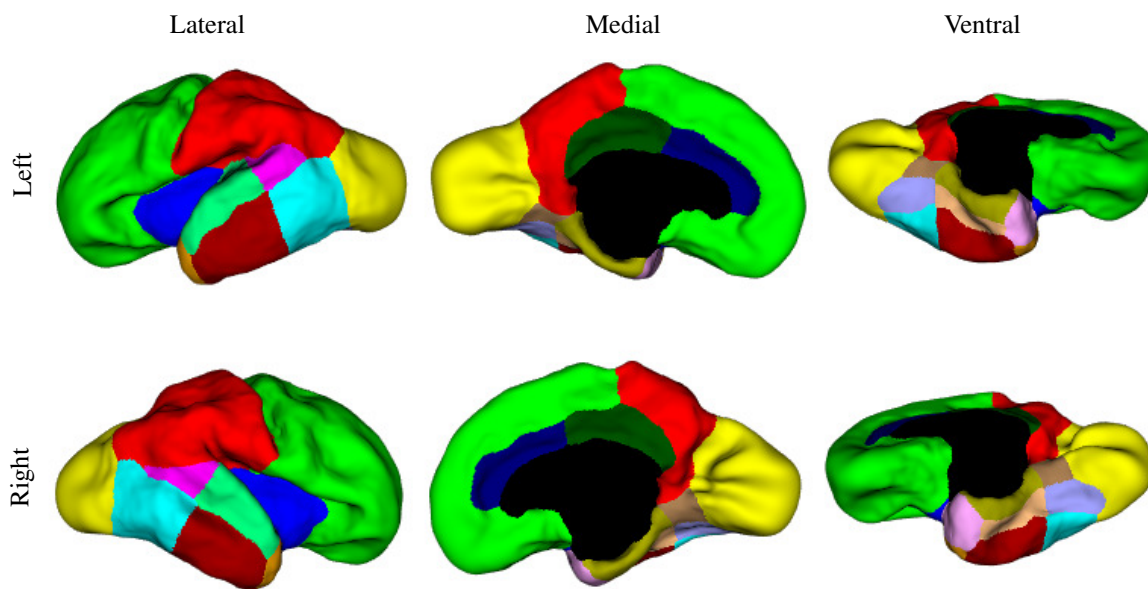

Figure 47: Cortical surface parcellation for a 29.3 GW fetus with left INSVM.



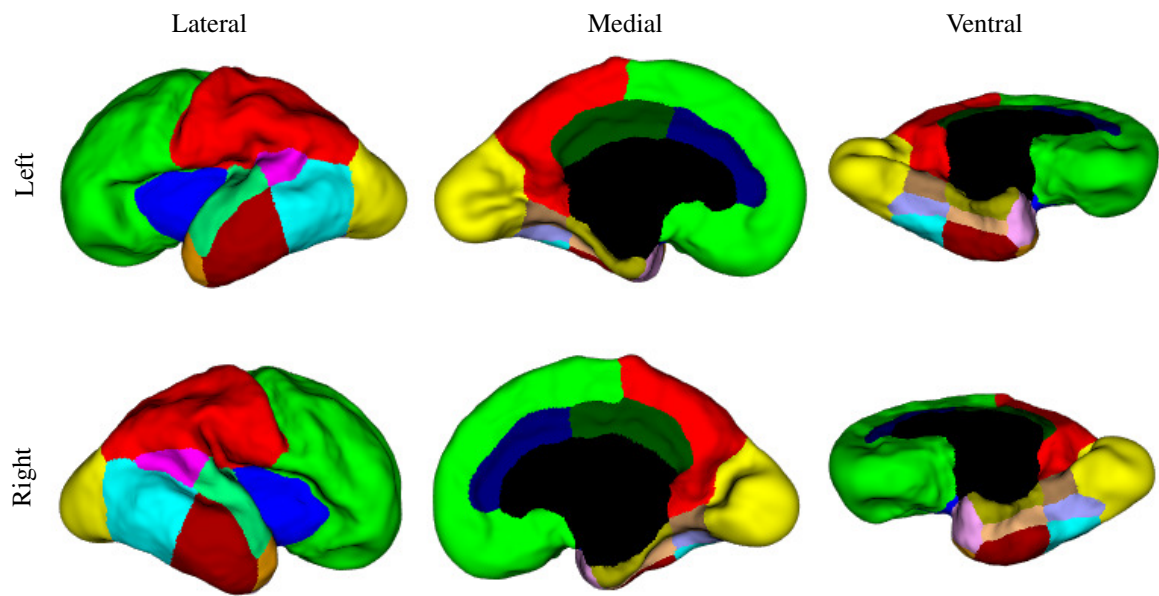

Figure 48: Cortical surface parcellation for a 28.4 GW healthy fetus.

## References

Makropoulos, A., Gousias, I., Ledig, C., Aljabar, P., Serag, A., Hajnal, J., Edwards, A., Counsell, S., Rueckert, D., 2014. Automatic whole brain MRI segmentation of the developing neonatal brain. *IEEE Transactions on Medical Imaging* 33, 1818–1831. doi:10.1109/TMI.2014.2322280.
